# **BNT162b2 Vaccine Induces Divergent B cell responses to SARS-CoV-2 S1 and S2**

R. Camille Brewer<sup>1</sup>, Nitya S. Ramadoss<sup>1</sup>, Lauren J. Lahey<sup>2</sup>,  
William H. Robinson<sup>1,\*</sup>, Tobias V. Lanz<sup>1,3,\*</sup>

## Affiliations

<sup>1</sup>Division of Immunology and Rheumatology, Department of Medicine, Stanford University School of Medicine, 269 Campus Drive, Stanford, CA 94305, United States, and the VA Palo Alto Health Care System, 3801 Miranda Ave, Palo Alto, CA 94304, United States

<sup>2</sup>Biophysics Program, Stanford University, ChEM-H Building, 290 Jane Stanford Way, Stanford, CA 94305

<sup>3</sup>Department of Neurology, Mannheim Center for Translational Neurosciences (MCTN), Medical Faculty Mannheim, University of Heidelberg, Theodor-Kutzer-Ufer 1-3, 68167 Mannheim, Germany

\*equal contributions, corresponding authors

**The first ever messenger RNA (mRNA) vaccines received emergency approvals in December 2020 and are highly protective against SARS-CoV-2<sup>1-3</sup>. However, the contribution of each dose to the generation of antibodies against SARS-CoV-2 spike (S) protein and the degree of protection against novel variants, including delta, warrant further study. Here, we investigated the B cell response to the BNT162b2 vaccine by integrating repertoire analysis with single-cell transcriptomics of B cells from serial blood collections pre- and post-vaccination. The first vaccine dose elicits highly mutated IgA<sup>+</sup> plasmablasts against the S protein subunit S2 at day 7, suggestive of recall of a memory B cell response generated by prior infections with heterologous coronaviruses. On day 21, we observed minimally-mutated IgG<sup>+</sup> activated switched memory B cells targeting the receptor binding domain (RBD) of the S protein, likely representing a primary response derived from naïve B cells. The B cell response against RBD is specifically boosted by the second vaccine dose, and encodes antibodies that potently neutralize SARS-CoV-2 pseudovirus and partially neutralize novel variants, including delta. These results demonstrate that the first vaccine dose activates a non-neutralizing recall response**

35 **predominantly targeting S2, while the second vaccine dose is vital to boosting neutralizing**  
36 **anti-S1 RBD B cell responses.**

37 BNT162b2 is one of the two first widely available vaccines that are based on lipid  
38 nanoparticle delivery of modified mRNA and is dependent on the host cells for translation and  
39 cell surface expression of the SARS-CoV-2 spike (S) protein<sup>4</sup>. S consists of two subunits, S1 and  
40 S2. The S1 subunit contains the receptor binding domain (RBD) that binds human ACE2 and  
41 initiates viral cell entry, while S2 mediates viral cell membrane fusion<sup>5,6</sup>. RBD is the target of  
42 most neutralizing antibodies found in COVID-19 patients<sup>7</sup>. Serological and repertoire studies  
43 from COVID-19 patients have characterized neutralizing antibodies to S protein<sup>1,2,8,9</sup>. However,  
44 the cellular processes that lead to potent neutralizing antibodies in response to mRNA vaccines  
45 are not fully characterized and to what degree these antibodies protect against novel variants  
46 remains unclear.

#### 47 **Single-cell sequencing of B cells**

48 Nine healthy individuals were included in this study, all naive to prior SARS-CoV-2  
49 infection (Extended Data Table 1). One individual contracted symptomatic and PCR-positive  
50 COVID-19 eight weeks after the second vaccine. Magnetically enriched peripheral blood B cells  
51 were investigated by droplet-based single-cell sequencing prior to the first vaccination (D0), as  
52 well as 7-9 days (D7), 21-23 days (D21), and 28 days (D28) after the first vaccination (Fig. 1a).  
53 All individuals received their second dose on D21. In addition, SARS-CoV-2 S-specific B cells  
54 were labeled with S1, S2, and RBD tetramers conjugated to fluorochromes and DNA-barcodes,  
55 and FACS-sorted before sequencing (Fig. 1a). A total of 131,138 B cells (~3600 per sample)  
56 were included in the global B cell transcriptomic analysis. Dimensionality Reduction by Uniform  
57 Manifold Approximation and Projection (UMAP)<sup>10</sup> and graph-based clustering distinguished  
58 nine B cell populations present in all individuals at all four timepoints, including the canonical  
59 naïve B cell, unswitched memory (UM) and switched memory (SM) B cell, and plasmablast  
60 (PB) clusters (Fig. 1b, Extended Data Fig. 1a-b). Naive B cells and SM were further categorized  
61 into resting and activated populations by *CD24* and *CD86* gene expression (Extended Data Fig.  
62 1c-e)<sup>11</sup>. Cluster assignments are supported by isotype proportions and mutation frequencies  
63 (Extended Data Fig. 1f-g).

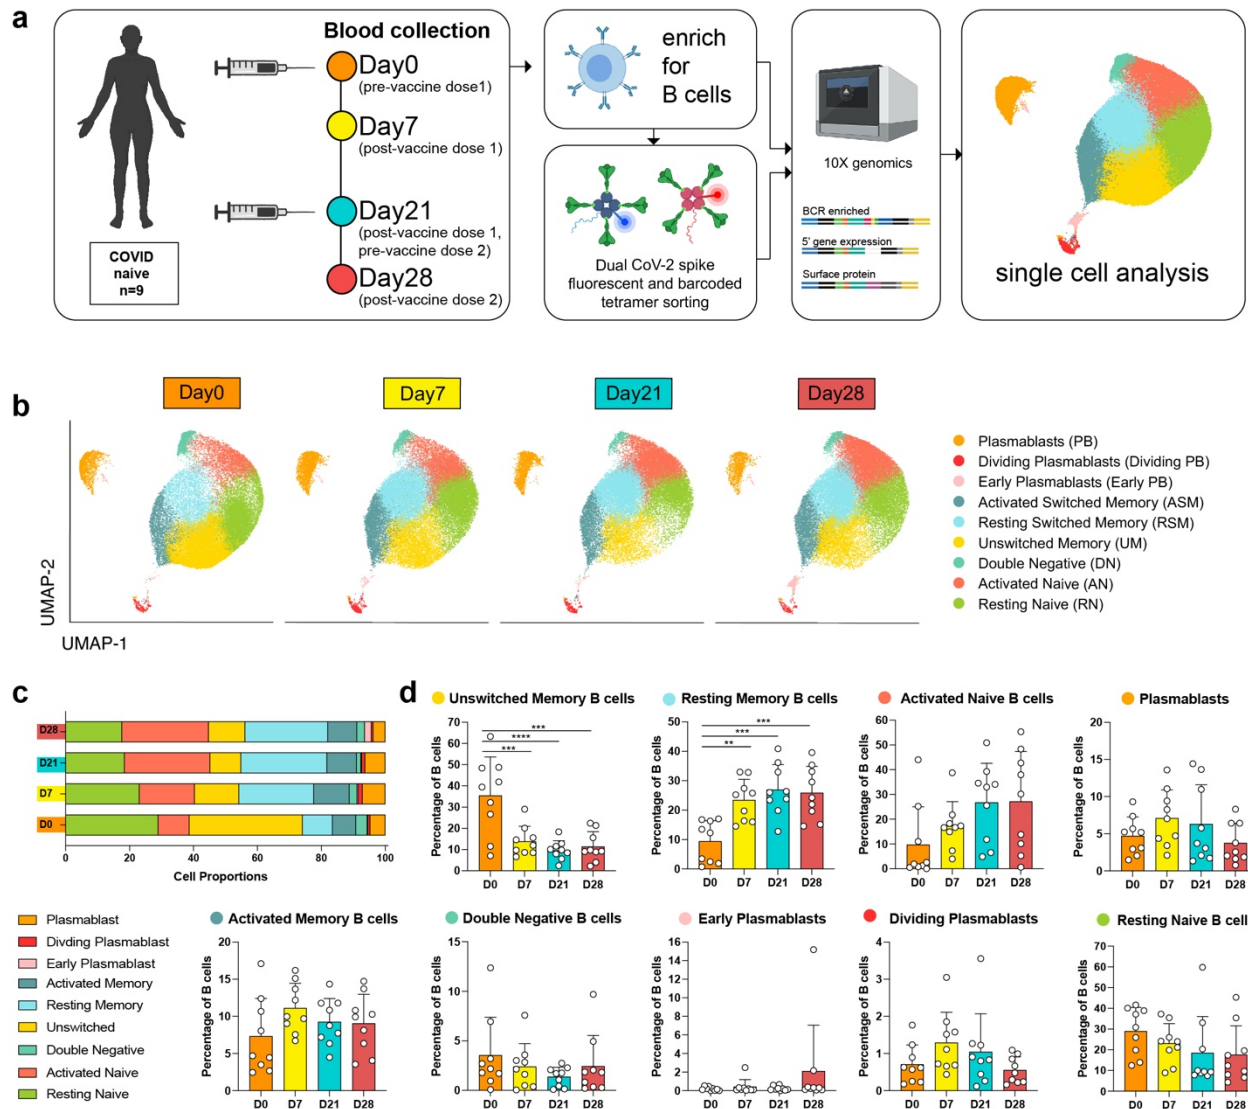

64  
 65 **Fig. 1: Single cell transcriptomic analysis of the B cell response following BNT162b2 vaccination.**  
 66 **a**, Outline of experimental approach. **b**, UMAP visualization of single-cell B cell transcriptome sequencing  
 67 data of all individuals at four timepoints. B cell cluster assignments are based on gene expression and  
 68 cell surface expression (CITE-seq) of canonical B cell markers. **c**, Mean percentages of B cell subtypes  
 69 shown in **(b)**. **d**, Individual and mean percentages of B cell types in **(b)** at four timepoints.  $n=9$  individuals  
 70 at all timepoints. Individual values, means and standard deviations are shown.  $**P<0.01$ ,  $***P<0.001$ ,  
 71  $****P<0.0001$  according to two-tailed one-way ANOVA test in comparison to the first timepoint.

72 **Unswitched memory (UM) differentiation into resting memory B cells (RSM) in response to**  
 73 **vaccination**

74 To evaluate changes in the B cell transcriptome in response to the mRNA vaccine, B cell  
 75 subtypes were followed over time (Fig. 1b-d). Strikingly, UM decreased after the initial

76 vaccination, while RSM expanded (Fig. 1c,d). To track the diminishing UM, we followed  
77 clonally expanded UM from D0 to the post-vaccination timepoints by their clonal B cell receptor  
78 (BCR) sequences (Fig. 2a). Pre-vaccine UM develop into RSM in response to vaccination, with  
79 no significant change in mutation load (Fig. 2a, Extended Data Fig. 2a-b), suggesting  
80 differentiation without germinal center (GC) maturation. Clonal UM and RSM have little  
81 connectivity to PB or activated switched memory (ASM) B cell clusters, indicating activation  
82 and differentiation of UM is independent of the antibody response against SARS-CoV-2 (Fig. 2a,  
83 Extended Data Fig. 2c). Pathway enrichment analysis of UM and RSM determined significant  
84 changes in leukocyte activation, cytokine signaling, and B cell signaling pathways post  
85 vaccination (Extended Data Fig. 3a,b). Accordingly, we observed increased expression of B cell  
86 signaling and activation genes in UM (Fig. 2b). In contrast, we observed downregulation of the  
87 same genes in RSM after vaccination (Fig. 2c). However, upregulation of CD83 and CD69 in  
88 RSM indicates recent activation (Extended Data Fig. 3d,e)<sup>12,13</sup>. Together, this suggests that  
89 vaccination activates UM and induces class-switching and differentiation into RSM, independent  
90 of the GC. RSM, once differentiated, downregulate their activation levels.

### 91 **PB and ASM recruitment in response to vaccination**

92 PB are short-lived, activated B cells that expand in response to antigen stimulation and  
93 secrete large amounts of antibodies<sup>14</sup>. In contrast to strong PB expansions in other vaccination  
94 settings<sup>15</sup>, overall PB numbers in our study only slightly increase post SARS-CoV-2 vaccination  
95 (Fig. 1d, Extended Data Fig. 4a). To identify B cell populations directly involved in the antigen-  
96 specific response, we focused on clonal B cell expansions that include PB at D28 (Fig. 2d).  
97 Based on shared BCR sequences, we found strong connectivity between the PB, dividing PB,  
98 and ASM subsets (Fig. 2d, Extended Data Fig. 2c). Genes associated with leukocyte activation  
99 and protein processing are enriched in PB, consistent with their function as antibody producers  
100 (Extended Data Fig. 3c). Enrichment of genes associated with SARS-CoV-2 infection at D21  
101 suggests that recognition of viral proteins trigger similar pathways in immunization and infection  
102 (Extended Data Fig. 3c). Overall, the majority of genes associated with B cell activation increase  
103 over time in response to vaccination (Fig. 2e).

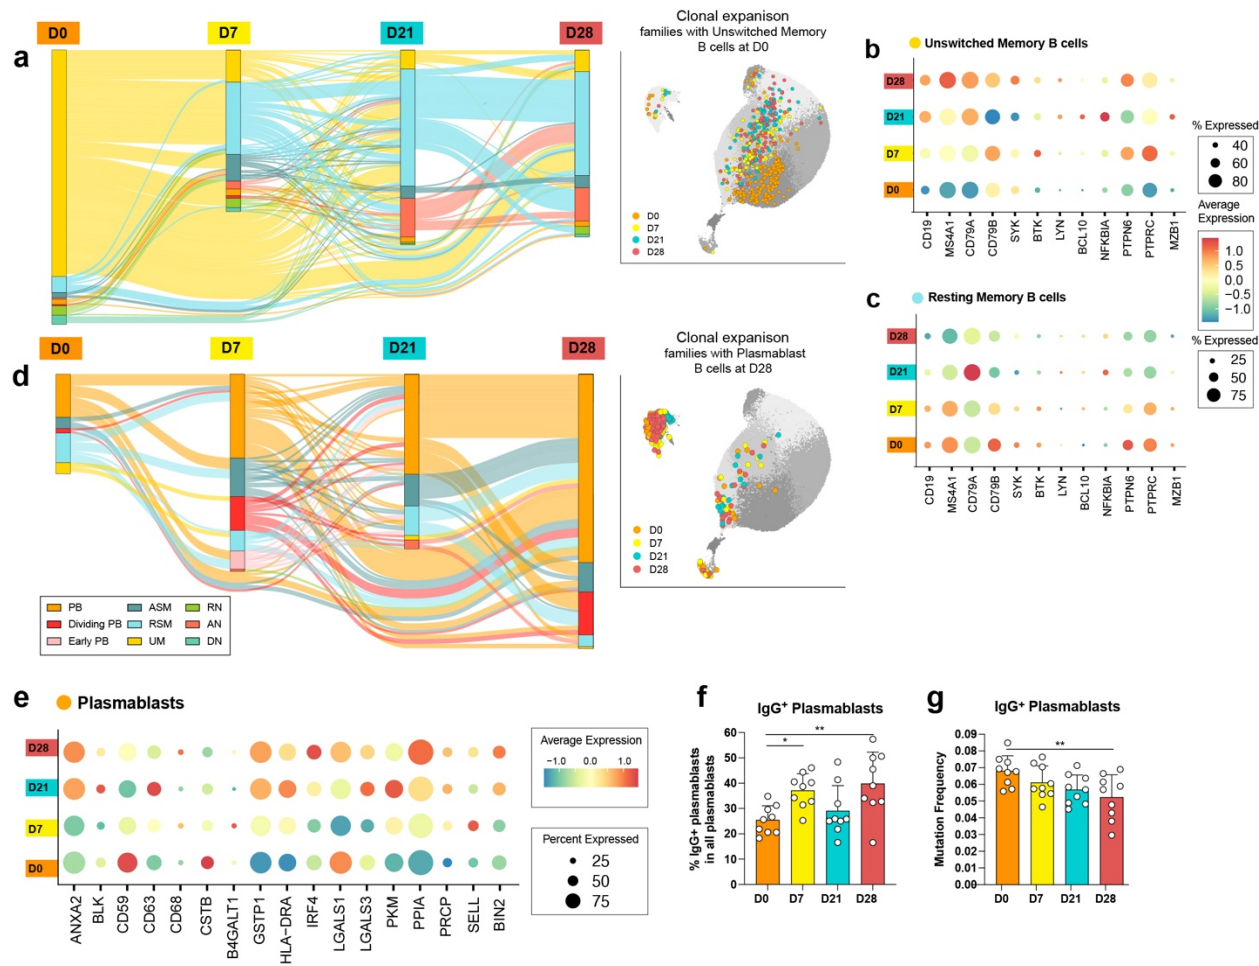

104

105 **Fig. 2: Unswitched memory B cell differentiation and expansion of IgG<sup>+</sup> plasmablasts in response**  
 106 **to vaccination.** **a**, Alluvial plot of B cell trajectories (left) across timepoints and UMAP projection (right) of  
 107 clonally expanded B cells that are related to at least one UM at D0. Clonal expansions included have  $\geq 3$   
 108 members at  $\geq 2$  timepoints. **b-c**, Gene expression in UM (**b**) and RSM (**c**) of genes involved in B cell  
 109 signaling and activation. **d**, Alluvial plot of B cell trajectories (left) and UMAP projection (right) of clonally  
 110 expanded B cells that are related to at least one PB at D28. Clonal expansions included have  $\geq 3$   
 111 members at  $\geq 2$  timepoints. **e**, Gene expressions of activation markers in PB. **f**, Percentage of IgG<sup>+</sup> PB per  
 112 individual (n=9), at four timepoints. **g**, Average mutation frequency of IgG<sup>+</sup> PB per individual (n=9) at four  
 113 timepoints. Individual values, means and standard deviations are shown. \* $P < 0.05$ ; or \*\* $P < 0.01$   
 114 according to two-tailed one-way ANOVA test in comparison to the first timepoint.

115

116 In health, a high proportion of peripheral blood PB are IgA<sup>+</sup> due to ongoing immune  
 117 responses at the mucosal barriers. IgG<sup>+</sup> PB of non-mucosal origin increase during systemic  
 118 infection and vaccination<sup>16,17</sup>. Congruently, we observed an increase in IgG<sup>+</sup> PB one week after

119 the first and second vaccination, respectively (Fig. 2f, Extended Data Fig. 4b-e), with strongest  
120 expansions in the inflammatory subtypes IgG1 and IgG3 (Extended Data Fig. 4c). The average  
121 mutation frequencies of IgG<sup>+</sup> PB decrease over time, indicative of an influx of cells into PB from  
122 the naïve B cell pool rather than from memory B cells (Fig. 2g). Together, our results show that  
123 clonal PB and ASM are closely connected, and new, low mutation IgG<sup>+</sup> PB are recruited in  
124 response to vaccination.

### 125 **S-specific B cells expand in response to vaccination**

126 To further characterize the S-specific B cell response to vaccination, we labeled B cells  
127 with fluorescently labeled S1, S2, and RBD antigen tetramers, each with unique barcodes, and  
128 FACS-sorted tetramer-specific and non-specific IgA<sup>+</sup>/G<sup>+</sup> PB and IgA<sup>+</sup>/G<sup>+</sup> SM (Extended Data  
129 Fig. 5a). Antigen-specificity of each single B cell could be determined by their barcode after  
130 demultiplexing (Extended Data Fig. 6a-d). In contrast to the global PB population (Fig. 1d), and  
131 in line with our observation on the IgG<sup>+</sup> PB population (Fig. 2f), S-specific IgA<sup>+</sup>/G<sup>+</sup> PB strongly  
132 expand one week after the initial vaccination and to a lesser degree after the second vaccination  
133 (Fig. 3a, Extended Data Fig. 5b). The S-specific IgA<sup>+</sup>/G<sup>+</sup> SM response increases over time from  
134 D7 to D28 (Fig. 3b, Extended Data Fig. 5d). Both S-specific populations, SM and PB, shift from  
135 IgA<sup>+</sup> to IgG<sup>+</sup> over time (Fig. 3c, Extended Data Fig. 5c,e).

### 136 **Differential B cell response to S1 and S2**

137 Vaccine studies have shown that antibody responses against distinct epitopes contribute  
138 differentially to immune protection<sup>18</sup>. Here, we investigated how the antibody response to each  
139 subunit of S varies within B cell subsets and over time. UMAP-analysis revealed that S2-specific  
140 B cells are predominantly PB and appear in large numbers as early as D7 (Fig. 3d-f). In contrast,  
141 the majority of RBD-specific B cells and B cells that bind S1 but not RBD (S1n) are ASM (Fig.  
142 3d,e, Extended Data Fig. 5f). Additionally, the RBD and S1n-specific B cells need longer to  
143 develop, accounting for less than 20% of S-specific B cells on D7 and over 50% by D28 (Fig.  
144 3d-f.). The S2-specific PB response is highly clonal and IgA1<sup>+</sup> dominated, while RBD and S1n-  
145 specific ASM use predominantly IgG1, and are less clonally expanded than S2 PB (Fig. 3g,h).  
146 The rapid recall of S2 and delayed S1 response indicates that the S2 B cell response is a  
147 secondary response, while the B cell response to RBD is a primary response.

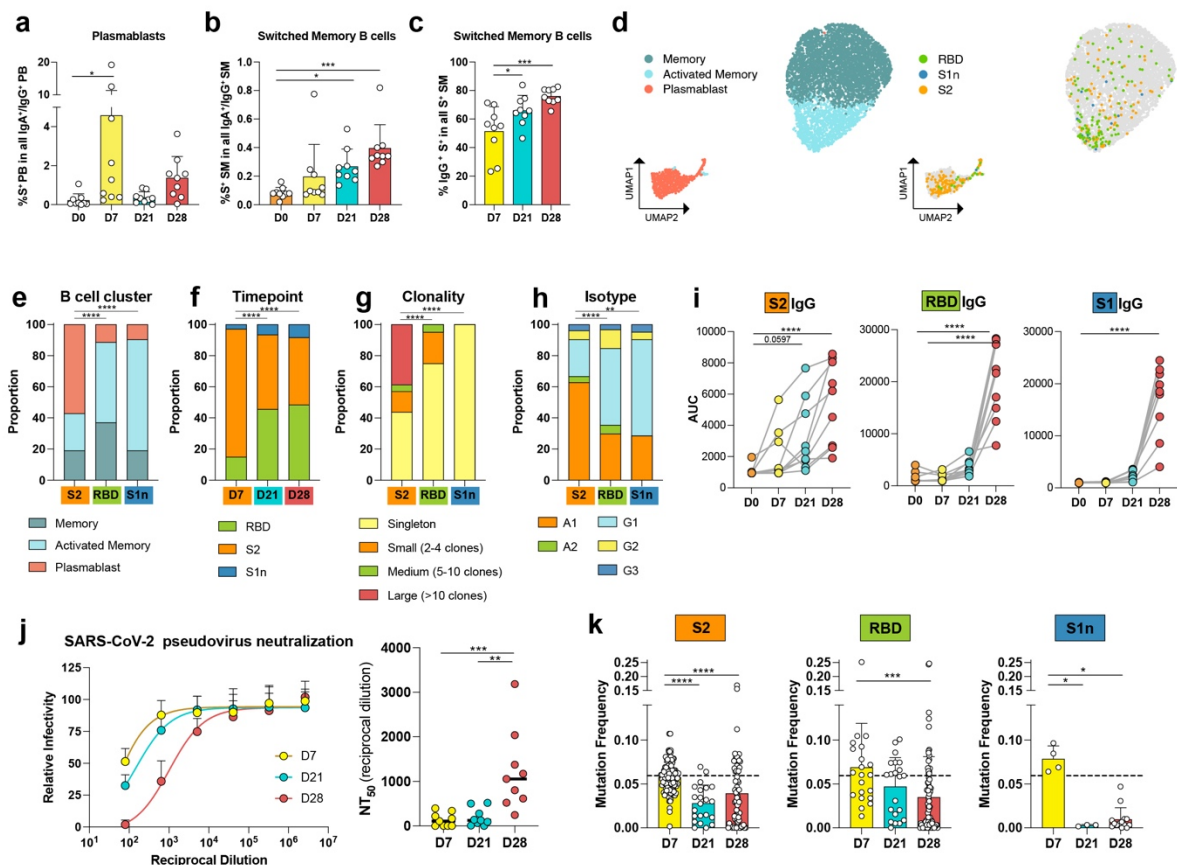

148 **Fig. 3: Vaccination induces a IgA<sup>+</sup> anti-S2 response on day 7 followed by IgG<sup>+</sup> RBD response on**  
 149 **days 21 and 28. a-c**, Quantification of flow cytometry data, showing percentages of **a**, anti-S PB, and **b**,  
 150 anti-S SM in all B cells at four timepoints. **c**, Percentage of IgG<sup>+</sup> anti-S SM in all anti-S SM at four  
 151 timepoints.  $n=9$  individuals per timepoint. Individual data points are averages of two independent  
 152 experiments. **d**, UMAP visualization of demultiplexed transcriptomic data of anti-S<sup>+</sup> and anti-S<sup>-</sup> sorted B  
 153 cells, showing cluster assignments of memory (blue), activated memory (turquoise), and PB (red) (left)  
 154 and antigen-specificity to S2 (orange), RBD (green), and S1n (blue) (right). **e-h**, Proportions of sorted  
 155 cells shown in **(d)**, separated by antigen and by **e**, cluster distribution, **f**, timepoint, **g**, clonality, and **h**,  
 156 isotype. **i**, Plasma IgG levels against S2 (left), RBD (center), and S1 (right) for  $n=9$  individuals at four  
 157 timepoints. AUC for plasma dilutions are shown. **j**, Plasma neutralization curves (left) and quantification  
 158 (NT<sub>50</sub>) of neutralization titers (right) of  $n=9$  individuals at timepoints post vaccination. **k**, V-gene mutation  
 159 frequencies (number of mutations per length of V-gene) of B cells specific for S2 (left), RBD (center), and  
 160 S1n (right) at timepoints post vaccination. Dashed line indicates the average mutation frequency of sorted  
 161 antigen negative B cells. Individual data points represent single B cells from  $n=9$  individuals. Means and  
 162 standard deviations are shown. \* $P < 0.05$ , \*\* $P < 0.01$ , \*\*\* $P < 0.001$ , \*\*\*\* $P < 0.0001$  according to two-tailed  
 163 one-way ANOVA test in comparison to the first timepoint displayed and **g-j**, chi-square test.

164 The early S2 PB response is echoed by the early development of anti-S2 plasma  
165 antibody titers, which start leveling off at D21. Strikingly, RBD and S1 IgG and IgA titers  
166 remain low until day 28, one week after the second vaccination (Fig. 3i, Extended Data Fig. 7a-  
167 d). Accordingly, plasma neutralization of SARS-CoV-2 Wuhan-Hu-1 pseudovirus is  
168 significantly boosted after the second vaccination (Fig. 3j). As primarily anti-RBD antibodies  
169 have the potential to block viral entry into the cell, this differentiation is critical and highlights  
170 the importance of the second injection for a protective anti-RBD response. Notably, it is  
171 overlooked in studies that focus solely on the anti-S antibody response.

172 Interestingly, one study participant contracted COVID-19 eight weeks after the second  
173 vaccination. The individual exhibited the lowest IgG and IgA titers for RBD and the lowest  
174 plasma neutralization potency following both vaccine doses in the tested cohort (Extended Data  
175 Fig. 8a-c). While this individual did produce B cells with high-affinity neutralizing BCR  
176 sequences (P1 in Fig. 4e,f), antibody secretion seemingly did not occur on sufficient levels.  
177 Antibody titers did not increase significantly even two weeks after the infection (Extended Data  
178 Fig. 8d), suggesting that low antibody titers in this individual are not confined to the mRNA  
179 vaccine.

### 180 **Influx of minimally-mutated anti-RBD B cells**

181 During antigen-specific B cell responses, BCR sequences tend to accumulate mutations  
182 during affinity maturation<sup>19</sup>. In contrast, neutralizing antibodies from COVID-19 patients show  
183 characteristically low mutation rates, indicating recruitment of naïve B cells to the GC in  
184 response to a novel antigen that has little structural overlap with previously encountered  
185 pathogens<sup>20</sup>. In our study, D7 B cells specific for any of the three antigens showed mutation  
186 frequencies similar to the antigen-negative sorted B cells, suggesting that this initial response  
187 stems directly from the memory B cell pool (Fig. 3k). At this early timepoint, S2-specific B cells  
188 predominate over RBD and S1n-specific B cells, providing further evidence that the rapid  
189 memory recall response is more effective for S2 than S1 (Fig. 3f, k). Consistent with this  
190 observation, S2 is more conserved among human pathogenic coronaviruses than S1<sup>21,22</sup>.  
191 Strikingly, at timepoints D21 and D28, with the influx of S1-specific B cells, mutation  
192 frequencies decrease (Fig. 3k). Together, these results indicate new recruitment from the naïve B  
193 cell pool and short GC maturation in response to the vaccine.



## 194 Vaccine-induced neutralization of variants

195 To test if these newly-recruited, minimally mutated anti-S antibodies are better at binding  
196 the S subunits than the early, highly mutated anti-S antibodies recruited from the memory B cell  
197 pool, we expressed 50 representative BCR sequences as recombinant monoclonal antibodies  
198 (rmAbs) — 14 from S2-specific, 30 from S1/RBD-specific, and 6 from S1n-specific B cells  
199 (Extended Data Table 2). Of those selected antibodies, 8 rmAbs bound S2, 15 rmAbs bound  
200 RBD, and 3 rmAbs bound S1 but not RBD, as measured by ELISA and bio-layer interferometry  
201 (Fig. 4a and Extended Data Fig. 9). Interestingly, when we compared low and high binding anti-  
202 S1 rmAbs (encompassing RBD and S1n) we found that high binding rmAbs show significantly  
203 lower mutation frequencies than low binding anti-S1 rmAbs (Fig. 4b). In contrast, mutation  
204 frequencies of rmAbs against S2 did not differ significantly between low and high binders (Fig.  
205 4c). Additionally, the S2 binders with the highest affinities were derived from D7 PB, while  
206 highest affinity antibodies against S1 and RBD stemmed from D21 and D28 (Fig. 4a). S2 is the  
207 more highly conserved subunit of S<sup>22,23</sup> To determine if the rmAbs were cross-reactive to other  
208 beta-coronaviruses, we tested the highest binders to RBD and S2 against the spike protein of four  
209 pathogenic beta-coronaviruses — HCoV-229E, HCoV-HKU1, HCoV-NL63, HCoV-OC43. Of  
210 note, nine of the 12 rmAbs against S2 cross-react with HCoV-OC43 spike protein. Conversely,  
211 none of the tested anti-RBD rmAbs are cross-reactive to non-SARS-CoV-2 coronaviruses  
212 (Extended Data Figure 10). These results corroborate that anti-S2 B cells originate from a recall  
213 memory response to heterologous coronaviruses, while in order to generate protective high-  
214 affinity anti-RBD antibodies, maturation of naïve cells to PB and ASM is required. While  
215 increased affinity correlating with low mutation frequency is counter-intuitive, it is characteristic  
216 for the B cell repertoire in COVID-19 patients<sup>24,25</sup>, and likely caused by the novelty of S protein  
217 with little structural overlap to other pathogens, requiring strong recruitment from the naïve B  
218 cell pool.

219 The emergence of novel SARS-CoV-2 variants poses additional challenges to the management  
220 of the pandemic, and could jeopardize vaccine efficacy and the prospects of an expeditious  
221 return to normalcy. RBD mutations contribute significantly to immune escape. To evaluate the  
222 effects of variants on antibody neutralization, we selected ten high-affinity Wuhan-Hu-1-  
223 neutralizing anti-RBD rmAbs from three individuals (P1, P2, P6) with different levels of plasma  
224 neutralization against delta (Fig. 4d-f). Five different SARS-CoV-2 variants of concern

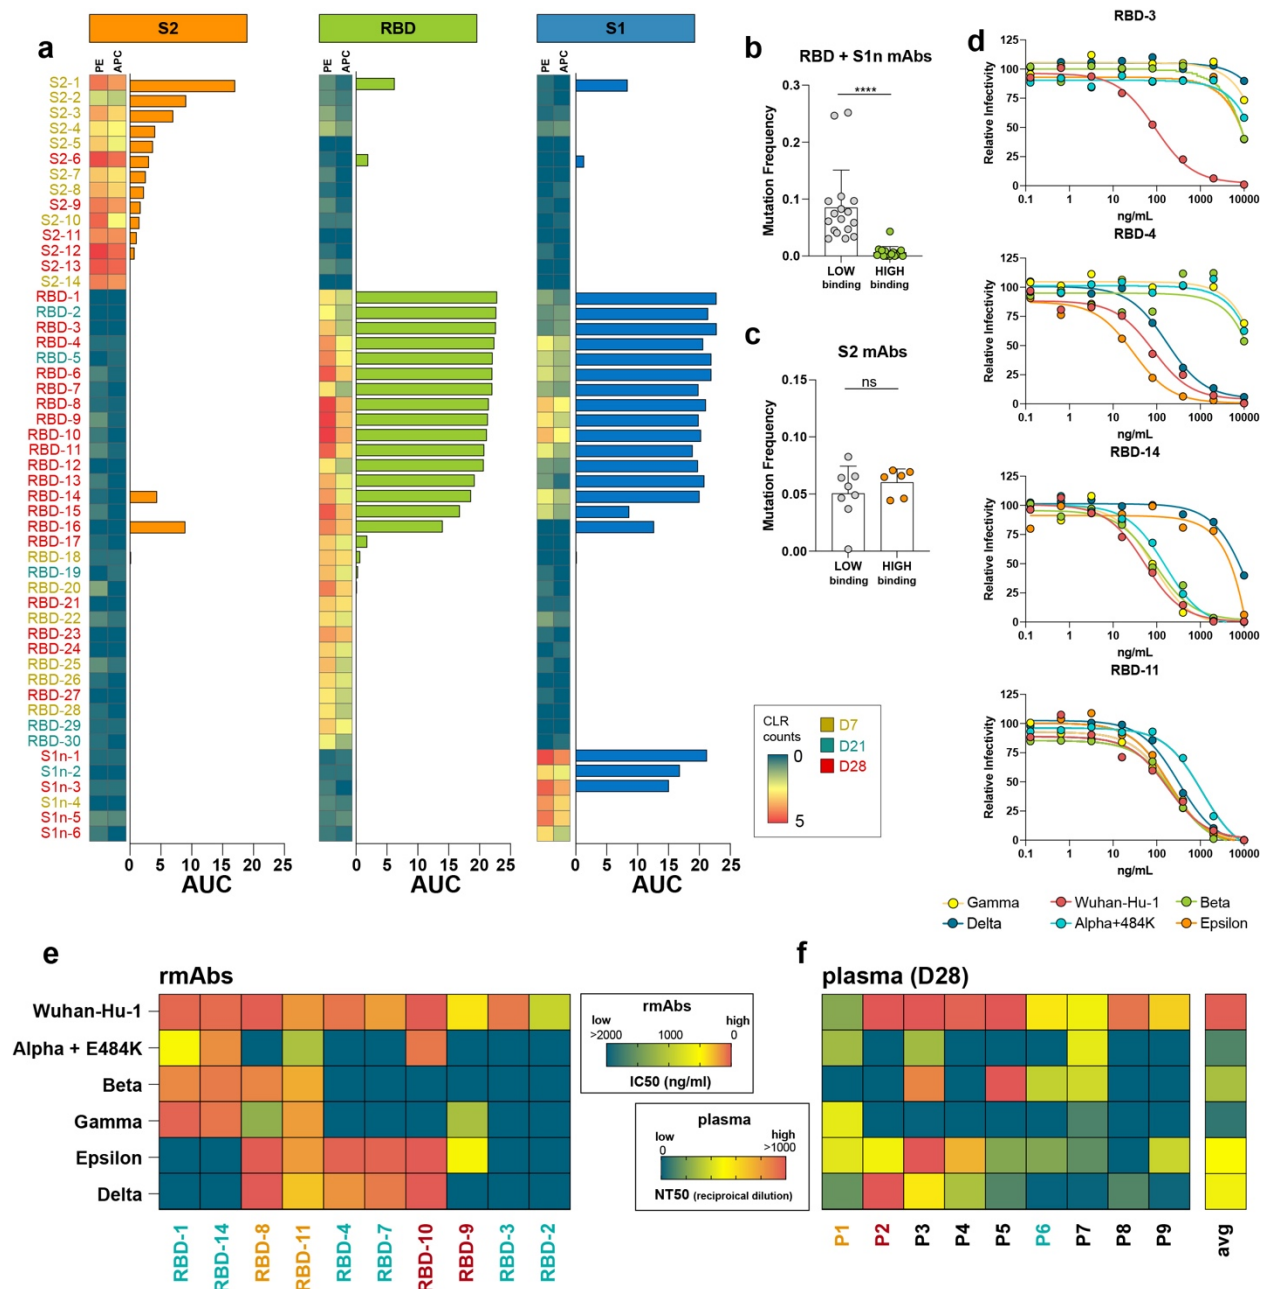

225  
 226 **Fig. 4: Neutralization of SARS-CoV-2 pseudovirus and variants by BNT162b2-induced antibodies.**  
 227 a, recombinant mAbs derived from BNT162b2-induced B cells bind S2, S1 RBD, and S1. Two-column  
 228 heatmaps show barcoded tetramer sequencing data (PE and APC labeled) represented as centered log  
 229 ratio transformed (CLR) counts. Bar graphs show binding of rmAbs generated from the corresponding B  
 230 cells, represented as area under the curve (AUC) of serial dilutions, measured by ELISA. Threshold,  
 231 represented as 0, was set to the average binding to BSA plus three times the standard deviation of  
 232 background binding to bovine serum albumin (BSA). **b-c**, Mutation frequencies (number of mutations per  
 233 length of V-gene) of **b**, anti-RBD and S1, and **c**, anti-S2 binding rmAbs from (a). High binding rmAbs are  
 234 defined as positive for double-barcoded tetramer binding and AUC >3. **d**, Neutralization curves for rmAbs

235 RBD-3, RBD-4, RBD-14, and RBD11, blocking Wuhan-Hu-1 pseudovirus and variants Alpha+E484K,  
236 beta, gamma, epsilon, and delta. **e-f**, Heatmaps indicating **e**, IC<sub>50</sub> (ng/ml) for each rmAb (**e**) and **f**, NT<sub>50</sub>  
237 (reciprocal dilution) of D28 plasma of n=9 individuals to the indicated pseudovirus variants. \*\*\*\**P*<0.0001  
238 according to unpaired two-tailed t-test.

239

240 were included (Extended Data Table 3) — variants alpha+E484K (B.1.1.7+E484K; N501Y,  
241 E484K), beta (B.1.351; N501Y, K417N), and gamma (P.1; N501Y, K417T) share a similar set  
242 of RBD mutations, of which N501Y contributes most to immune escape<sup>26</sup>. A different mutation,  
243 L452R, is shared by delta (B.1.617.2; L452R, T478K) and epsilon (B.1.429; L452R), and also  
244 promotes escape from antibody neutralization<sup>27</sup>. Each variant can be neutralized by at least four  
245 of the ten rmAbs, highlighting the vaccine's potency to generate at least partial protection to all  
246 variants (Fig. 4d,e, Extended Data Fig. 11). Antibody neutralization follows RBD mutations, as  
247 antibodies tend to block either alpha, beta, and gamma (N501Y), or delta and epsilon (L452R).  
248 Two antibodies (RBD-8 and RBD-11) were broadly neutralizing against all variants. Plasma  
249 neutralizations showed significantly lower potency against variants than against Wuhan-Hu-1 in  
250 all patients, while trending to a better neutralization of delta and epsilon than of alpha, beta, and  
251 gamma (Fig. 4f). Interestingly, while the plasma of individual P6 showed very limited  
252 neutralization efficacy to alpha, gamma, and delta, we show that P6 had potent neutralizing B  
253 cell clones against all variants. P6, therefore, will likely have an extended level of protection  
254 from a recall memory B cell response post vaccine, which is inaccessible to assessment by  
255 measuring plasma neutralization.

256

## 257 **Discussion**

258 Our study provides a detailed characterization of the B cell response to the BNT162b2  
259 mRNA vaccine on a single-cell level. Parsing the anti-S1 and S2 responses provides important  
260 insights into why the second vaccine dose is vital for protection. Our results demonstrate that the  
261 first vaccine dose activates a non-neutralizing recall response predominantly targeting epitopes  
262 in the S2 protein subunit, which is conserved across human-pathogenic coronaviruses<sup>22,23</sup>, while  
263 the second vaccine dose is vital to boosting neutralizing B cell responses to S1 and RBD.

264           The vaccination induces two major shifts in distinct B cell subtypes: (i) activation of  
265 UM and their differentiation into RSM, and (ii) activation and expansion of S antigen-specific  
266 PB and ASM. UM are thought to develop independently of the GC reaction, and possess a  
267 polyreactive repertoire for rapid B cell responses<sup>28</sup>. UM are broadly activated early after  
268 vaccination, consistent with a natural or ‘innate-like’ B cell response. The unchanged mutation  
269 frequency post differentiation indicates a GC-independent response. Once switched, activation  
270 levels in RSM decrease, indicating that they are not further promoting an activated B cell  
271 response.

272           In contrast, the antigen-specific PB and ASM response is likely derived from GC-  
273 dependent processes. The first vaccination induces an IgA-dominant PB response against S2  
274 with high mutation frequencies, which is cross-reactive to the human-pathogenic beta-  
275 coronaviruses OC43 and HKU1. Our data are consistent with a recall response of mucosal  
276 memory B cells that matured during prior pulmonary coronavirus infections.

277           After this initial response, we observed an influx of minimally mutated ASM on D21 and  
278 D28, which target S1 and RBD. We show that low mutation frequency corresponds to high  
279 affinity against RBD. mRNA vaccines have been shown to induce robust and prolonged GC  
280 reactions, with PB and SM persisting in GC for over three months<sup>29,30</sup>. Despite their low  
281 mutation frequency, the delayed development and the switched phenotype of S1/RBD-specific  
282 PB and ASM indicate that they underwent GC maturation. High BCR affinity and a naïve  
283 phenotype foster preferential recruitment into GC<sup>31–33</sup> and high affinity also promotes release  
284 from the GC as PB, plasma cells, or memory B cells<sup>34</sup>. High affinity of minimally mutated BCRs  
285 could therefore limit GC maturation to a relatively short time frame.

286           We utilized plasma samples and our low mutation RBD-binding rmAbs to characterize  
287 neutralization against several SARS-CoV-2 variants of concern. While we found a significant  
288 degree of immune escape, we also identified antibodies with neutralization potency against each  
289 variant. Importantly, we observed potent neutralization activity against the highly infectious  
290 delta variant, which has quickly become the dominant strain world-wide. Delta-neutralizing B  
291 cells were even found in an individual with very limited plasma neutralization potency, fueling  
292 hope that even individuals with low neutralizing titers can raise a recall memory response upon  
293 infection with delta.

294            Together, our study provides a detailed characterization of the blood B cell response to  
295 the BNT162b2 mRNA vaccine. Our data emphasize the importance of the second vaccine dose  
296 in inducing generation of anti-S1 RBD antibodies that contribute to neutralization of SARS-  
297 CoV-2 variants, including delta.

## 298 **Figure legends**

299 **Fig. 1: Single cell transcriptomic analysis of the B cell response following BNT162b2**  
300 **vaccination. a**, Outline of experimental approach. **b**, UMAP visualization of single-cell B cell  
301 transcriptome sequencing data of all individuals at four timepoints. B cell cluster assignments are  
302 based on gene expression and cell surface expression (CITE-seq) of canonical B cell markers. **c**,  
303 Mean percentages of B cell subtypes shown in **(b)**. **d**, Individual and mean percentages of B cell  
304 types in **(b)** at four timepoints.  $n=9$  individuals at all timepoints. Individual values, means and  
305 standard deviations are shown.  $**P < 0.01$ ,  $***P < 0.001$ ,  $****P < 0.0001$  according to two-tailed  
306 one-way ANOVA test in comparison to the first timepoint.

307 **Fig. 2: Unswitched memory B cell differentiation and expansion of IgG<sup>+</sup> plasmablasts in**  
308 **response to vaccination. a**, Alluvial plot of B cell trajectories (left) across timepoints and  
309 UMAP projection (right) of clonally expanded B cells that are related to at least one UM at D0.  
310 Clonal expansions included have  $\geq 3$  members at  $\geq 2$  timepoints. **b-c**, Gene expression in UM **(b)**  
311 and RSM **(c)** of genes involved in B cell signaling and activation. **d**, Alluvial plot of B cell  
312 trajectories (left) and UMAP projection (right) of clonally expanded B cells that are related to at  
313 least one PB at D28. Clonal expansions included have  $\geq 3$  members at  $\geq 2$  timepoints. **e**, Gene  
314 expressions of activation markers in PB. **f**, Percentage of IgG<sup>+</sup> PB per individual ( $n=9$ ), at four  
315 timepoints. **g**, Average mutation frequency of IgG<sup>+</sup> PB per individual ( $n=9$ ) at four timepoints.  
316 Individual values, means and standard deviations are shown.  $*P < 0.05$ ; or  $**P < 0.01$  according  
317 to two-tailed one-way ANOVA test in comparison to the first timepoint.

318 **Fig. 3: Vaccination induces a IgA<sup>+</sup> anti-S2 response on day 7 followed by IgG<sup>+</sup> RBD**  
319 **response on days 21 and 28. a-c**, Quantification of flow cytometry data, showing percentages of  
320 **a**, anti-S PB, and **b**, anti-S SM in all B cells at four timepoints. **c**, Percentage of IgG<sup>+</sup> anti-S SM  
321 in all anti-S SM at four timepoints.  $n=9$  individuals per timepoint. Individual data points are  
322 averages of two independent experiments. **d**, UMAP visualization of demultiplexed  
323 transcriptomic data of anti-S<sup>+</sup> and anti-S<sup>-</sup> sorted B cells, showing cluster assignments of memory  
324 (blue), activated memory (turquoise), and PB (red) (left) and antigen-specificity to S2 (orange),  
325 RBD (green), and S1n (blue) (right). **e-h**, Proportions of sorted cells shown in **(d)**, separated by  
326 antigen and by **e**, cluster distribution, **f**, timepoint, **g**, clonality, and **h**, isotype. **i**, Plasma IgG  
327 levels against S2 (left), RBD (center), and S1 (right) for  $n=9$  individuals at four timepoints. AUC

328 for plasma dilutions are shown. **j**, Plasma neutralization curves (left) and quantification (NT50)  
329 of neutralization titers (right) of n=9 individuals at timepoints post vaccination. **k**, V-gene  
330 mutation frequencies (number of mutations per length of V-gene) of B cells specific for S2 (left),  
331 RBD (center), and S1n (right) at timepoints post vaccination. Dashed line indicates the average  
332 mutation frequency of sorted antigen negative B cells. Individual data points represent single B  
333 cells from n=9 individuals. Means and standard deviations are shown. \* $P < 0.05$ , \*\* $P < 0.01$ ,  
334 \*\*\* $P < 0.001$ , \*\*\*\* $P < 0.0001$  according to two-tailed one-way ANOVA test in comparison to the  
335 first timepoint displayed and **g-j**, chi-square test.

336 **Fig. 4: Neutralization of SARS-CoV-2 pseudovirus and variants by BNT162b2-induced**  
337 **antibodies.** **a**, recombinant mAbs derived from BNT162b2-induced B cells bind S2, S1 RBD,  
338 and S1. Two-column heatmaps show barcoded tetramer sequencing data (PE and APC labeled)  
339 represented as centered log ratio transformed (CLR) counts. Bar graphs show binding of rmAbs  
340 generated from the corresponding B cells, represented as area under the curve (AUC) of serial  
341 dilutions, measured by ELISA. Threshold, represented as 0, was set to the average binding to  
342 BSA plus three times the standard deviation of background binding to bovine serum albumin  
343 (BSA). **b-c**, Mutation frequencies (number of mutations per length of V-gene) of **b**, anti-RBD  
344 and S1, and **c**, anti-S2 binding rmAbs from (**a**). High binding rmAbs are defined as positive for  
345 double-barcoded tetramer binding and  $AUC > 3$ . **d**, Neutralization curves for rmAbs RBD-3,  
346 RBD-4, RBD-14, and RBD11, blocking Wuhan-Hu-1 pseudovirus and variants Alpha+E484K,  
347 beta, gamma, epsilon, and delta. **e-f**, Heatmaps indicating **e**, IC50 (ng/ml) for each rmAb (**e**) and  
348 **f**, NT50 (reciprocal dilution) of D28 plasma of n=9 individuals to the indicated pseudovirus  
349 variants. \*\*\*\* $P < 0.0001$  according to unpaired two-tailed t-test.

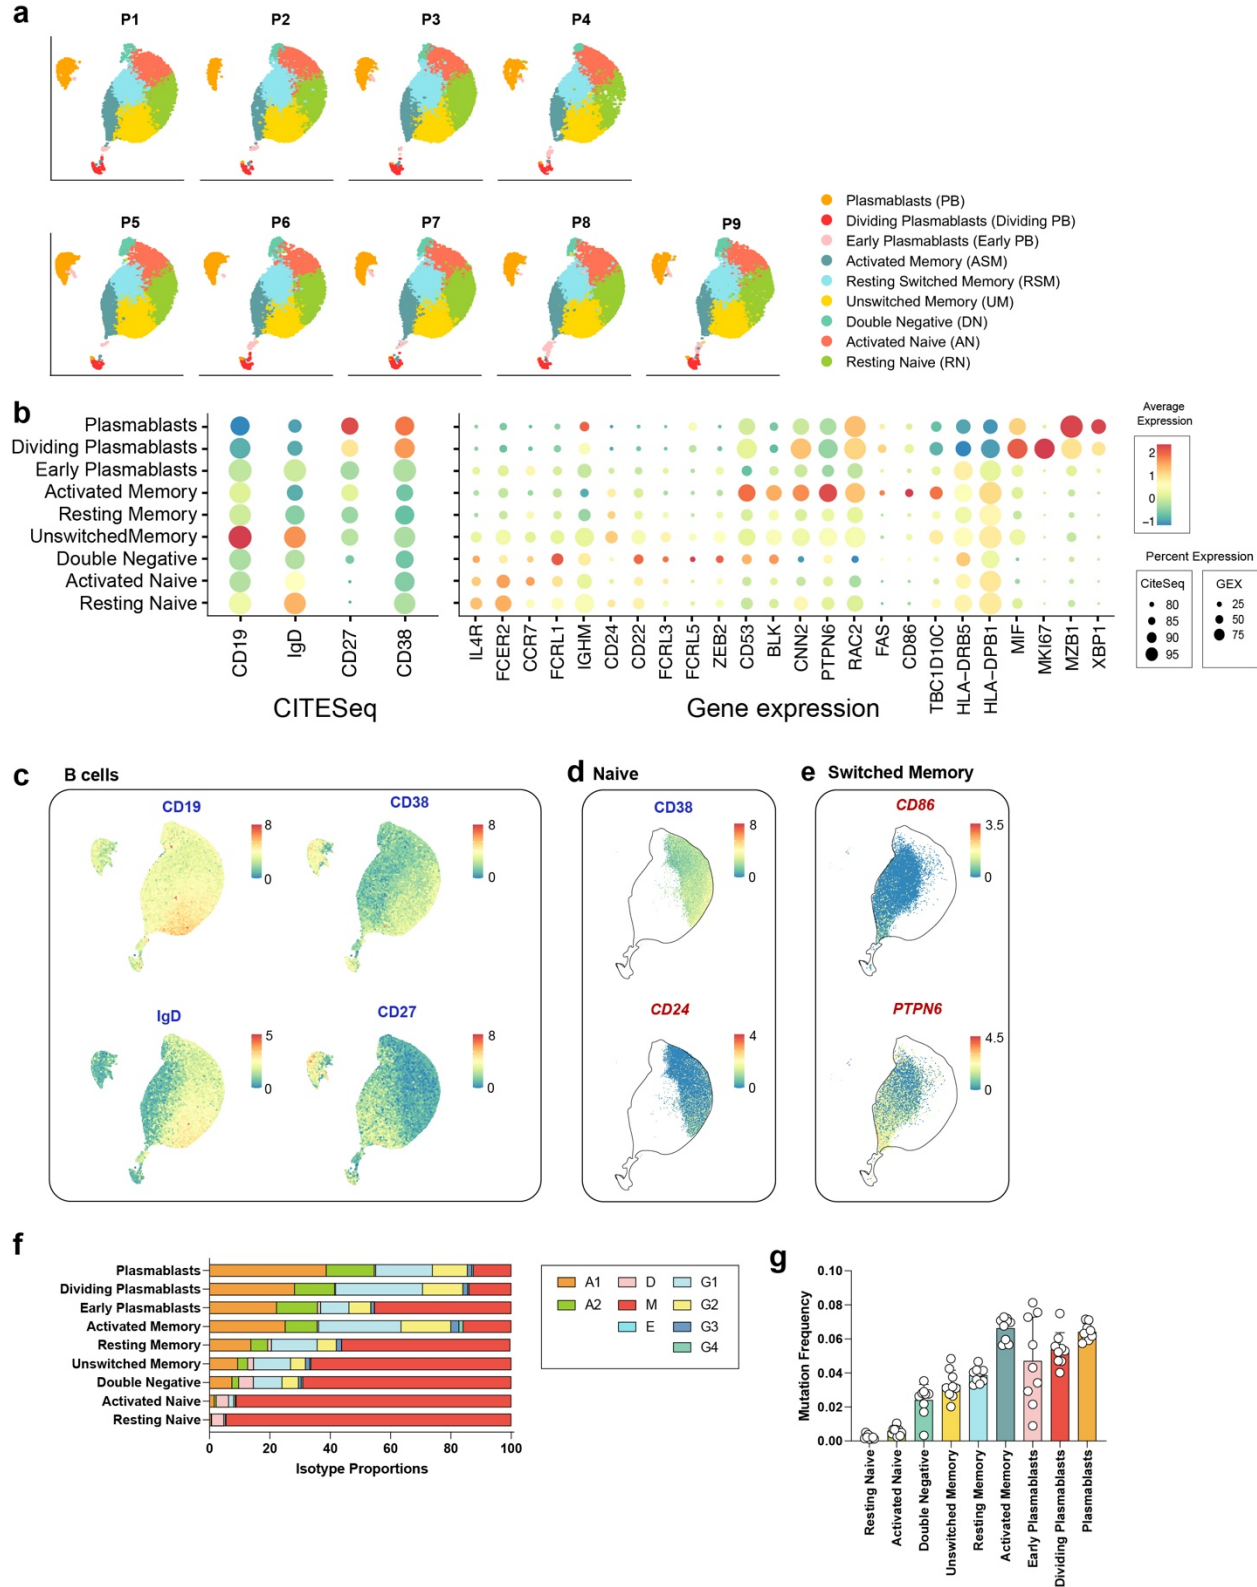

350

351 **Extended Data Figure 1: Classification of UMAP B cell clusters.** **a**, Distribution of B cell

352 clusters for each individual (n=9) included in the study. **b**, Gene and cell surface expression of B



353 cell clusters, represented as heatmap / dot plots. **c**, UMAP embedding of B cells colored by  
 354 CD19, CD38, IgD, and CD27 protein expression (blue). **d**, UMAP embedding of naïve B cells  
 355 colored by CD38 protein expression (blue), and *CD24* gene expression (red). **e**, UMAP  
 356 embedding of memory B cells colored by *CD86* and *PTPN6* gene expression (red). **f**, Average  
 357 proportions of isotype subclasses in each B cell cluster in  $n=9$  individuals vaccinated individuals  
 358 across all timepoints. **g**, Average combined mutation frequency (number of mutations per length  
 359 of V-gene) in light chain and heavy chain V-gene regions in  $n=9$  individuals in the respective  
 360 nine different B cell clusters. Individual values, means, and standard deviations are shown.

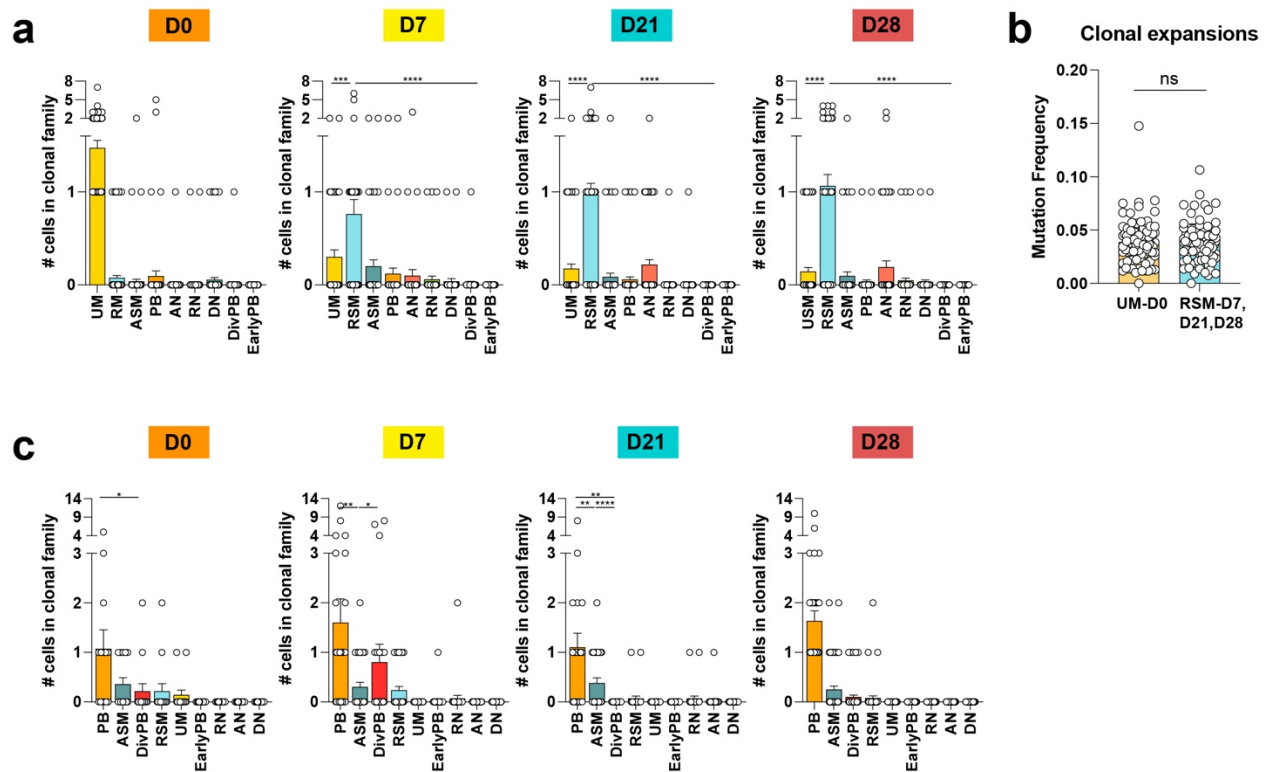

361  
 362 **Extended Data Figure 2: Characterization of clonal B cell expansions in response to mRNA**  
 363 **vaccination. a**, Cells corresponding to clonal expansions shown in (Fig 2a). Number of cells in  
 364 each clonal expansion ( $n=106$ ) in each B cell cluster at all four timepoints. Statistics are not  
 365 calculated for D0 as each clonal family is set to contain at least one clone at D0 in the UM B cell  
 366 cluster. **b**, Average mutation frequency (number of mutations per length of V-gene) of clonal  
 367 UM expansions at D0 and clonal RSM expansions at D7, D21, and D28. Each dot represents the  
 368 average of each mutation frequency for the clonal family in specified B cell clusters and time.  
 369 **c**, Cells corresponding to the clonal expansions shown in (Fig. 2d). Number of cells in each clonal

370 expansion ( $n=52$ ) in each B cell cluster at all four timepoints. Statistics are not calculated for  
 371 D28 as each clonal family is set to contain at least one clone at D28 in the PB cluster. Individual  
 372 values, and **a,c**, standard error of the means, and **b**, standard deviations are shown.  $**P < 0.01$ ,  
 373  $***P < 0.001$ ,  $****P < 0.0001$  according to **a,c**, two-tailed Kruskal-Wallis test and **b**, paired two-  
 374 tailed t test.

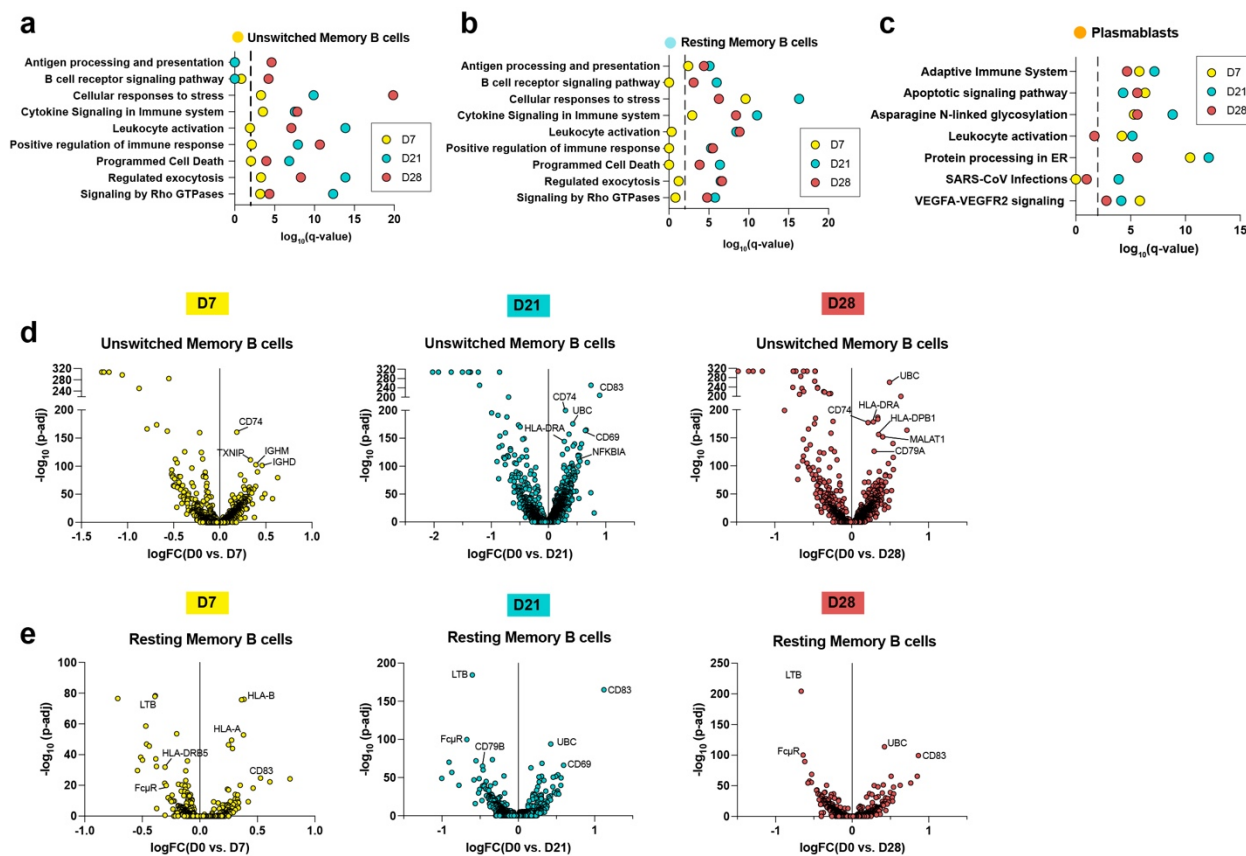

375  
 376 **Extended Data Figure 3: Pathway enrichments and differentially expressed genes in**  
 377 **response to mRNA vaccination. a-c**, Gene enrichment signatures of DEGs via Metascape<sup>35</sup> in  
 378 **a**, UM, **b**, RSM, and **c**, PB for D7 (yellow dots), D21 (turquoise dots), D28 (red dots) versus pre-  
 379 vaccination. Dashed line represents  $q < 0.01$ . **d,e**, Volcano plot of differentially expressed genes  
 380 in **d**, USM and **e**, RSM at timepoints D7 (left), D21 (center), and D28 (right) relative to D0.

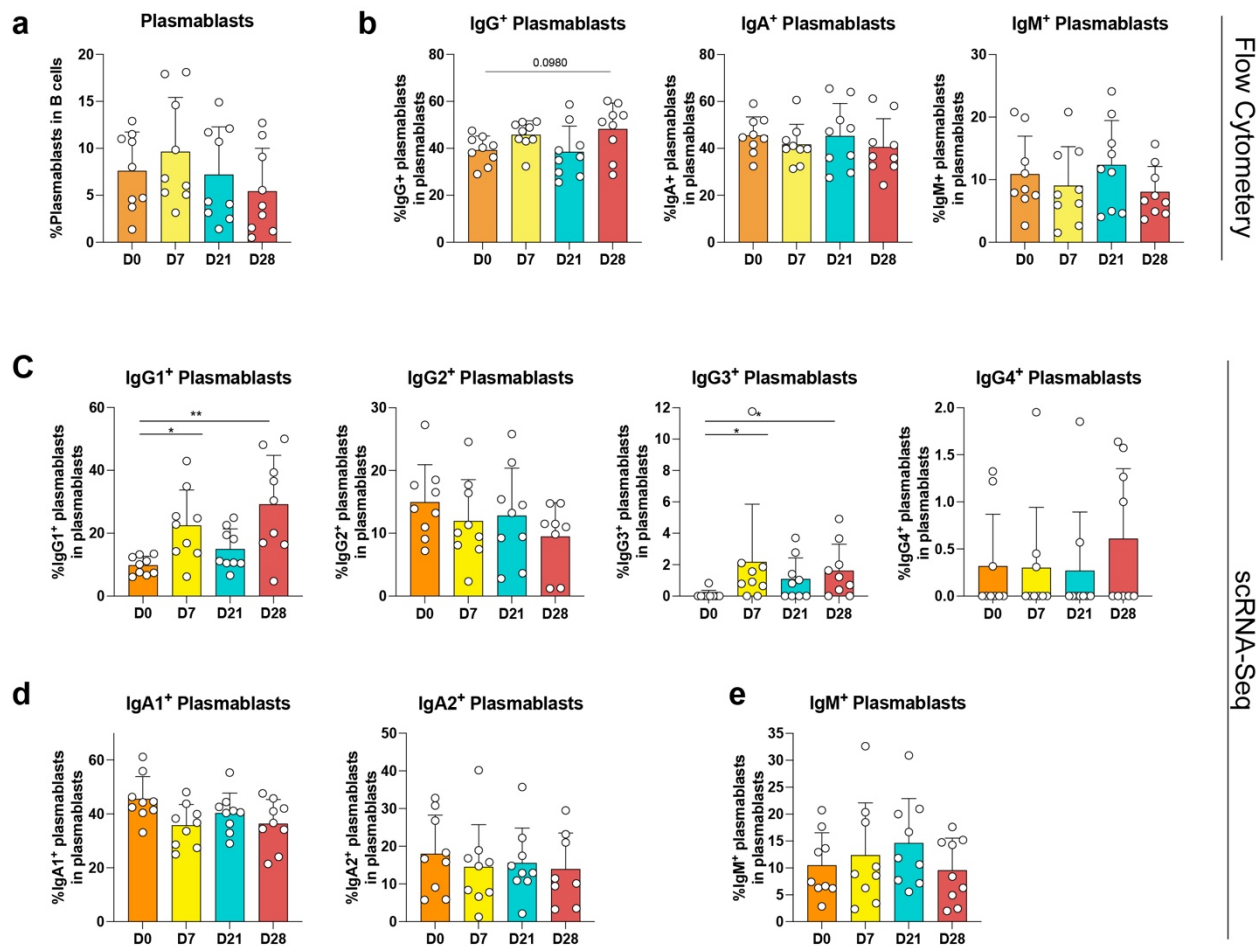

381  
 382 **Extended Data Figure 4: Global PB proportions measured by flow cytometry and scRNA-**  
 383 **Seq.** **a,b**, Flow cytometry data, **a**, mean percentages of PB in all B cells at the four indicated  
 384 timepoints. **b**, Proportions of IgG<sup>+</sup> (left), IgA<sup>+</sup> (center), and IgM<sup>+</sup> PB (right) of all PB. **c-e**,  
 385 scRNA-Seq data, proportions of **c**, IgG subclasses, **d**, IgA subclasses, and **e**, IgM in total PB.  
 386 n=9 individual values, means, standard deviations are shown. \* $P < 0.05$ , \*\* $P < 0.01$ ,  
 387 \*\*\* $P < 0.001$ , \*\*\*\* $P < 0.0001$ , or exact value according to two-tailed one-way ANOVA test.

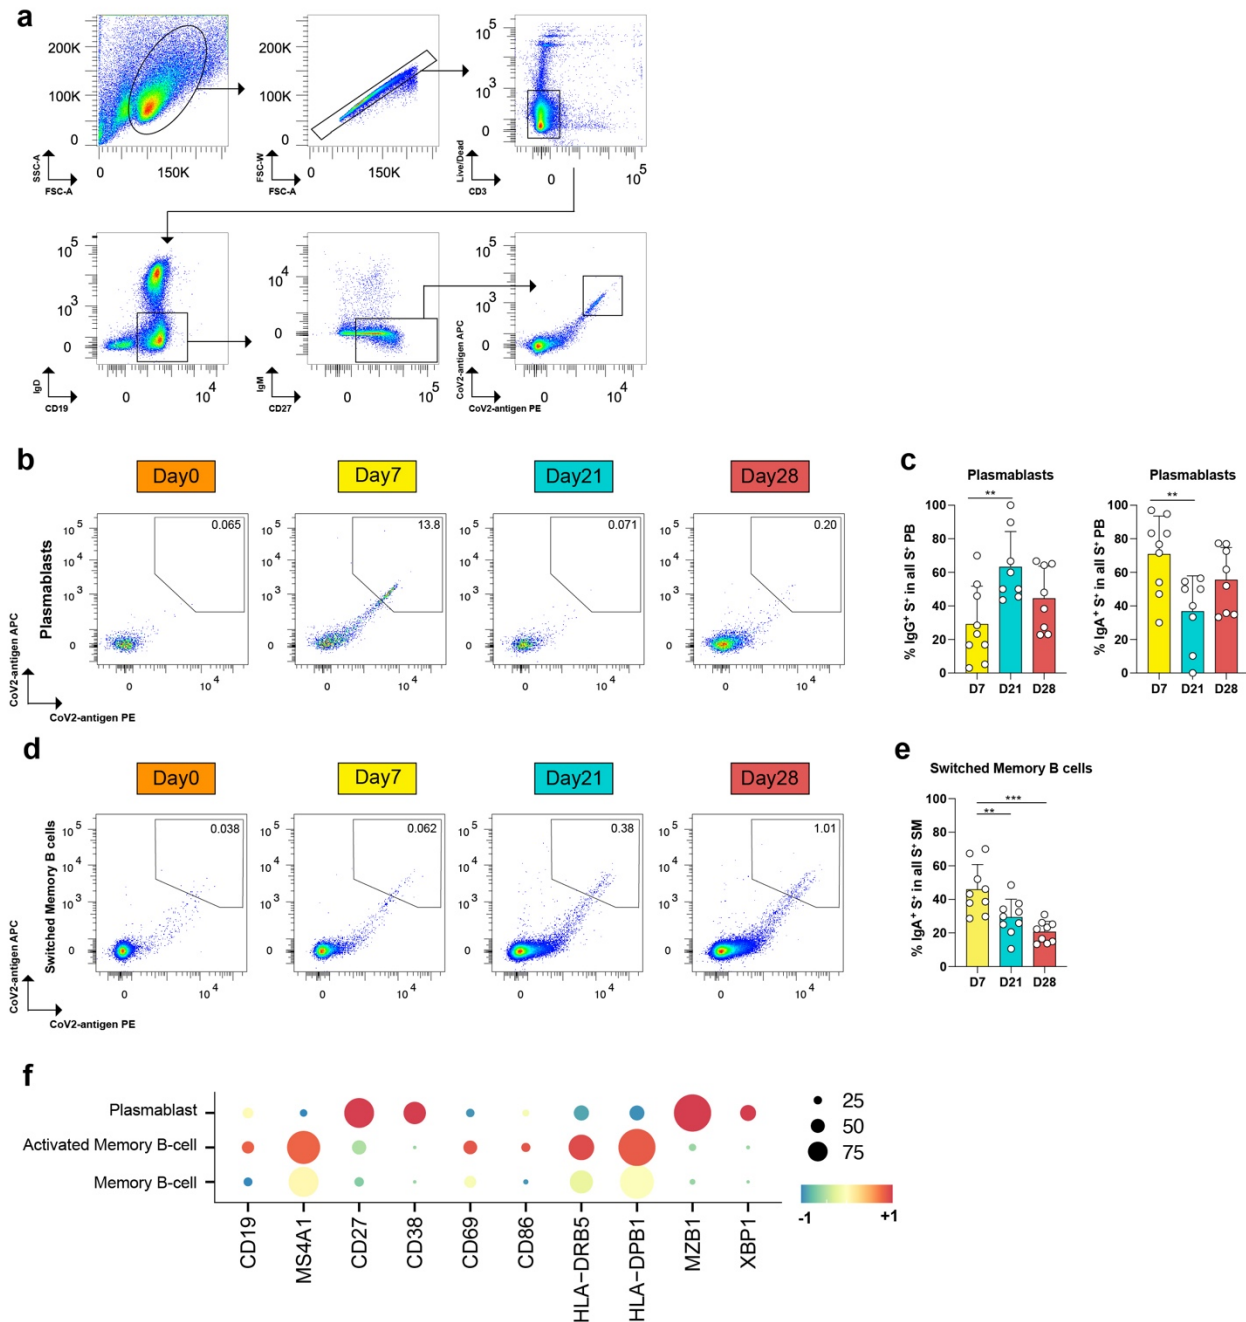

388

389 **Extended Data Figure 5: Characterization of sorted SARS-CoV-2<sup>+</sup> SM B cells and PB, a,**

390 Gating strategy for sorting on live singlet SM and PB based on marker expression: CD3<sup>-</sup>, Cd19<sup>+</sup>,

391 IgD<sup>-</sup>, IgM<sup>-</sup>, CD27<sup>+</sup>. Cells were stained with two antigen-tetramers for each subunit of S (S1, S2,

392 and RBD), respectively, labeled with PE and APC. Double-positive cells were sorted. **b,**

393 Representative flow cytometry plots of S<sup>+</sup> PB. **c,** Proportion of IgA<sup>+</sup> (left) and IgG<sup>+</sup> S<sup>+</sup>

394 PB in all S<sup>+</sup> PB at the indicated timepoints post vaccination. **d,** Representative flow cytometry

395 plots of S<sup>+</sup> SM. **e**, Proportion of IgA<sup>+</sup> S<sup>+</sup> SM in all S<sup>+</sup> SM at the indicated timepoints post  
396 vaccination. **f**, Dot plots of gene expression of B cell clusters shown in (**Fig. 3d**). **c,e**, n=9  
397 individual values, means, and standard deviations are shown. \**P*<0.05, \*\**P*< 0.01, \*\*\**P*< 0.001  
398 according to two-tailed one-way ANOVA test.

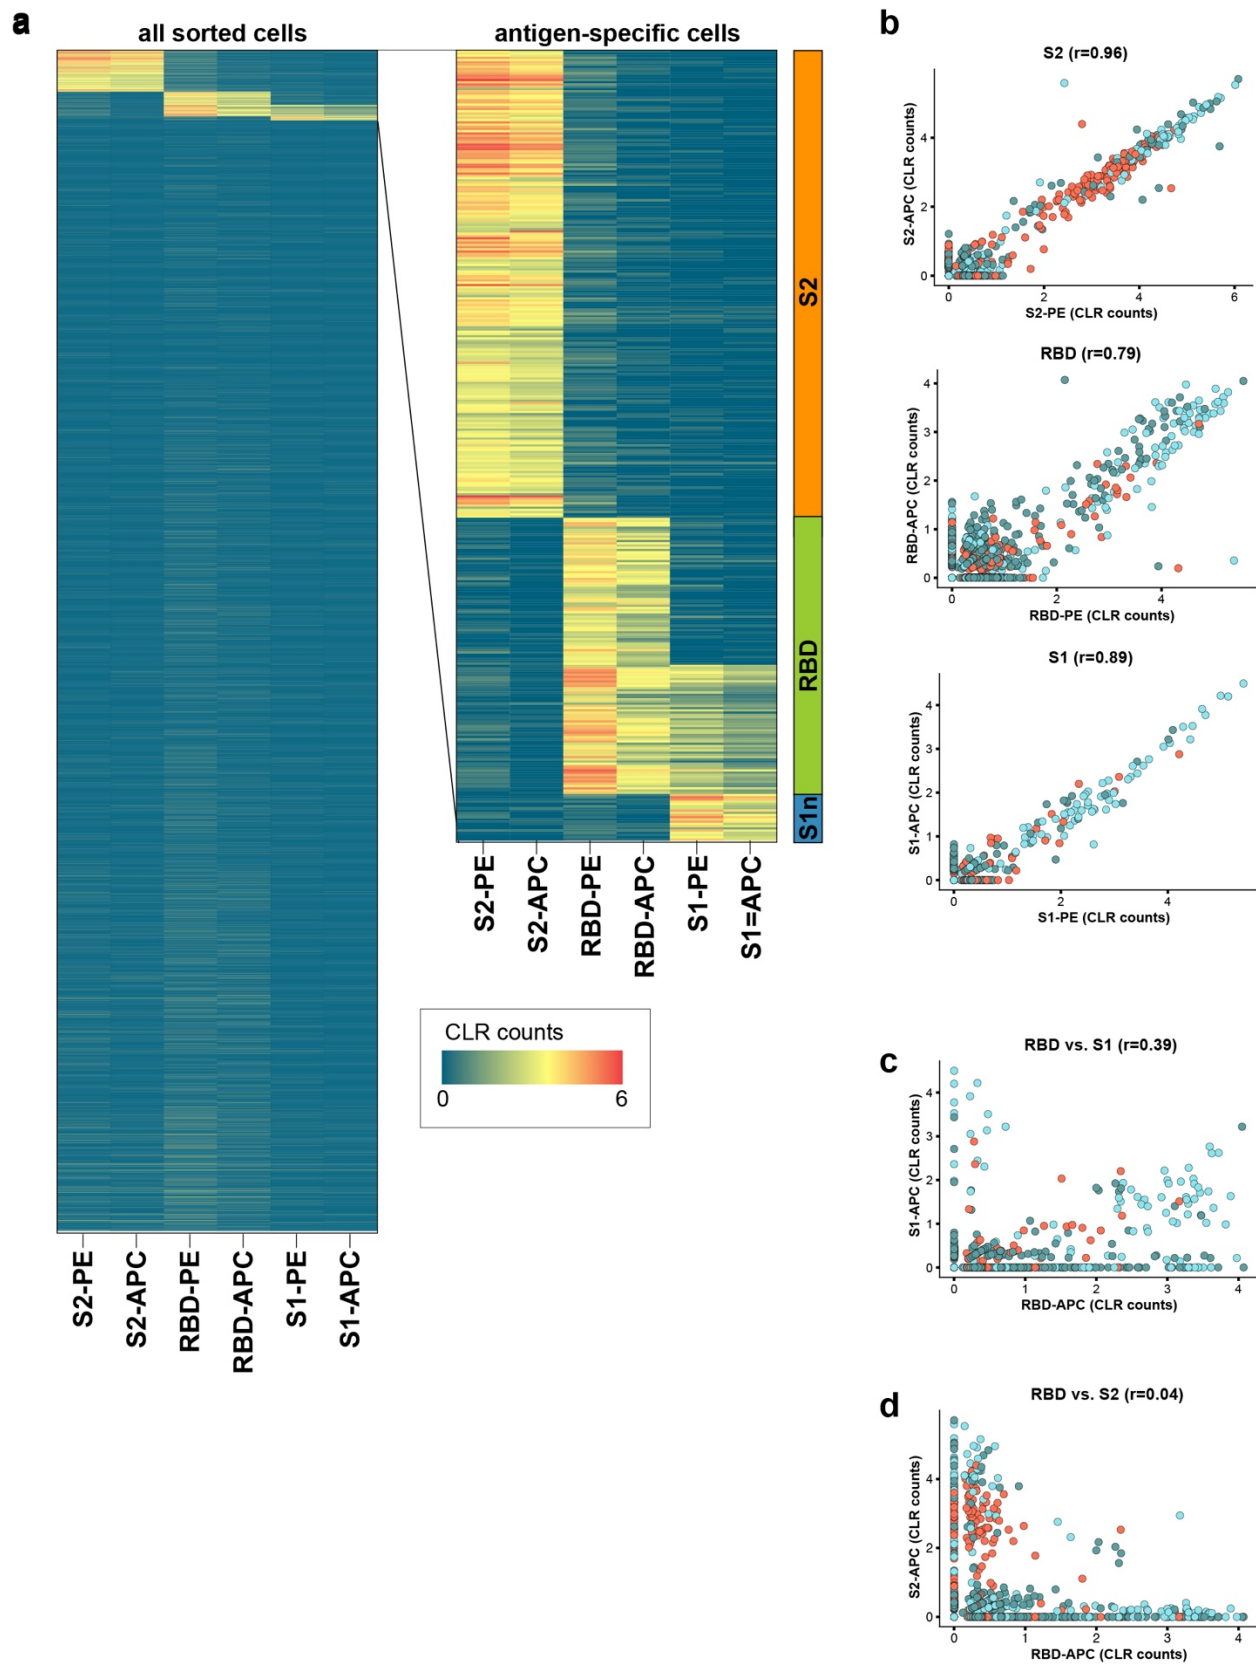

400 **Extended Data Figure 6: Specific binding of S antigen tetramers to sorted cells. a-d**, Single-  
401 cell sequencing data analysis of barcodes in de-multiplexed data set. Antigen-positive and  
402 negative CD3<sup>-</sup>, Cd19<sup>+</sup>, IgD<sup>-</sup>, IgM<sup>-</sup>, CD27<sup>+</sup> B cells were mixed during the sort. **a**, Heatmap of  
403 centered log ratio transformed (CLR) counts of barcoded PE and APC tetramers with S2, RBD,  
404 and S1 for all sorted cells. Inset magnifies the antigen-specific cells used in the analysis. **b**,  
405 Correlation of barcoded PE and APC tetramers S2 (top), RBD (middle), and S1 (bottom). **c**,  
406 Correlation of barcoded APC tetramers of S1 and RBD. **d**, Correlation of barcoded APC  
407 tetramers of S2 and RBD.

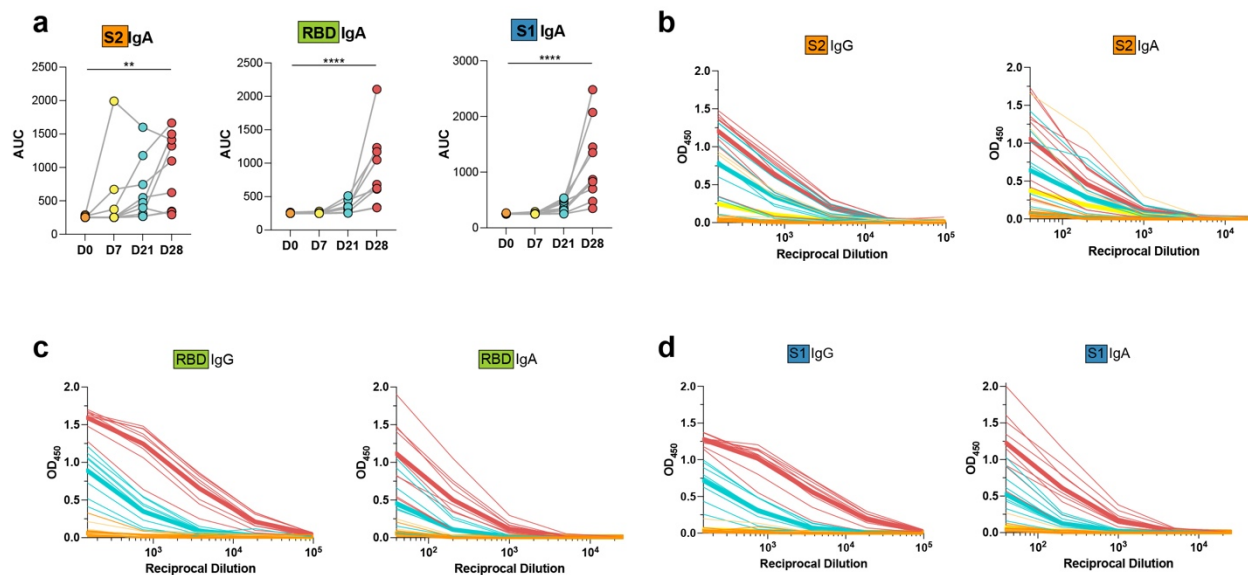

408 **Extended Data Figure 7: Plasma reactivity to S protein subunits. a**, Area under the curve  
409 (AUC) for anti-S2 IgA (left), anti-RBD IgA (center), and anti-S1 IgA (right) from n=9  
410 vaccinated individual plasma samples. **b-d**, Plasma IgG (left) and IgA (right) reactivity to **a**, S2,  
411 **b**, RBD, **c**, S1 as determined by ELISA. Graph shows optical density units at 450nm of serial  
412 plasma dilutions. \* $P < 0.05$ , \*\* $P < 0.01$ , \*\*\* $P < 0.001$ , according to two-tailed one-way ANOVA  
413 test.  
414

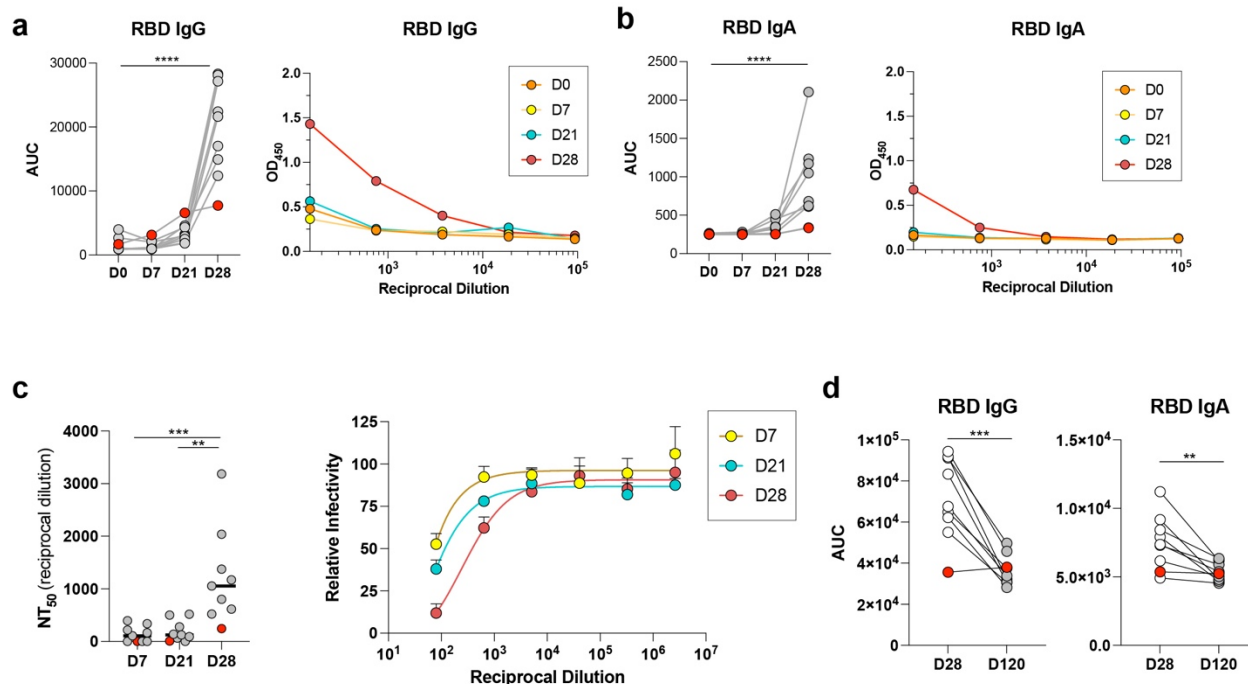

415  
 416 **Extended Data Figure 8: Analysis of individual P1 who contracted COVID-19 eight weeks**  
 417 **post second vaccination. a-b**, Plasma reactivities of **a**, IgG and **b**, IgA to RBD as measured by  
 418 ELISA in serial plasma dilutions (right) and depicted as AUC (left). **c**, Plasma neutralization  
 419 titers (left) and neutralization curves for plasma of individual P1 at D7, D21, D28 (right). **d**,  
 420 Plasma reactivities to RBD for IgG (left) and IgA (right), on D28 compared to day 120 (D120),  
 421 two weeks after COVID-19 diagnosis. P1 is highlighted in red, the other eight individuals are  
 422 grey. \* $P < 0.05$ , \*\* $P < 0.01$ , \*\*\* $P < 0.001$  according to **a-c**, two-tailed one-way ANOVA test and  
 423 **d**, paired t-test.



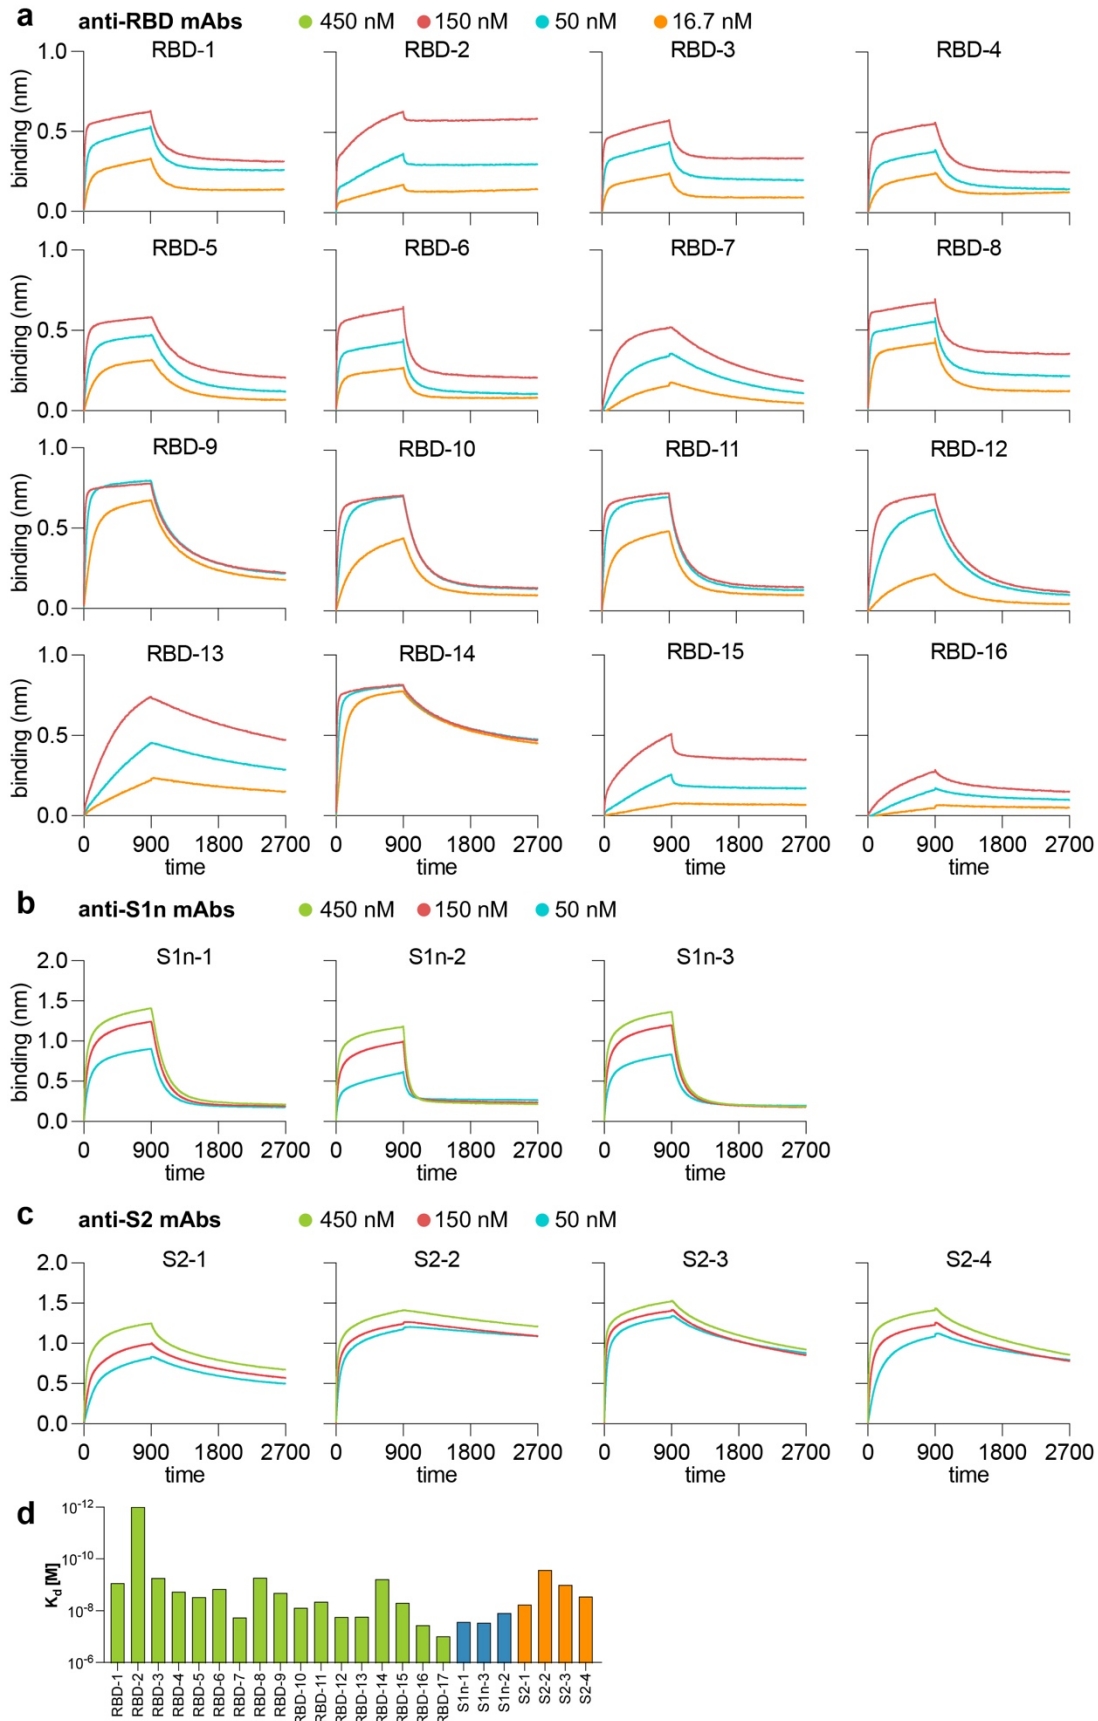

425 **Extended Data Figure 9: Binding affinities of anti-RBD, S1n, and S2 rmAbs.** a-c, rmAb-  
 426 antigen interaction intensities were measured by bio-layer interferometry with immobilized onto  
 427 Octet sensors, and S protein subunits. **a**, RBD, **b**, S1n, and **c**, S2 in solution. Binding curves are  
 428 shown for the indicated concentrations of antigen. **d**, Kd values of antibodies shown in a-c.

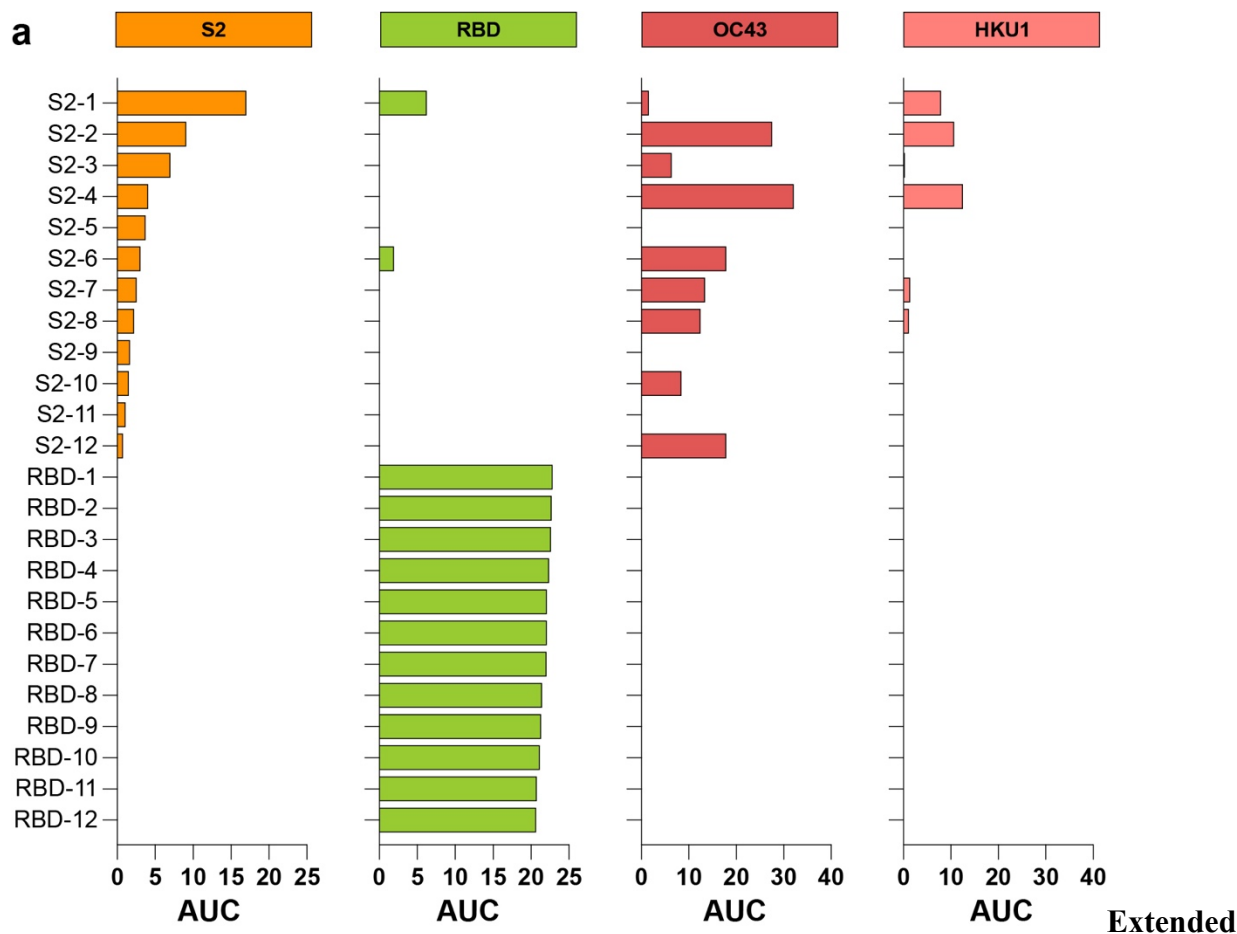

429 **Data Figure 10: Anti-S2 rmAbs are cross-reactive to other human-pathogenic beta-**  
 430 **coronavirus S proteins.** **a**, Binding of anti-S2 and anti-RBD rmAbs to SARS-CoV-2 S2, SARS-  
 431 CoV-2 RBD, HCoV-OC43 spike, and HCoV-HKU1 spike, assessed by ELISA and represented  
 432 as AUC of optical density measurements of serial dilutions. No binding was observed for HCoV-  
 433 229E and HCoV-NL63 spike proteins. Threshold, represented as 0, was set to the average  
 434 binding to BSA plus three times the standard deviation of background binding to BSA.  
 435

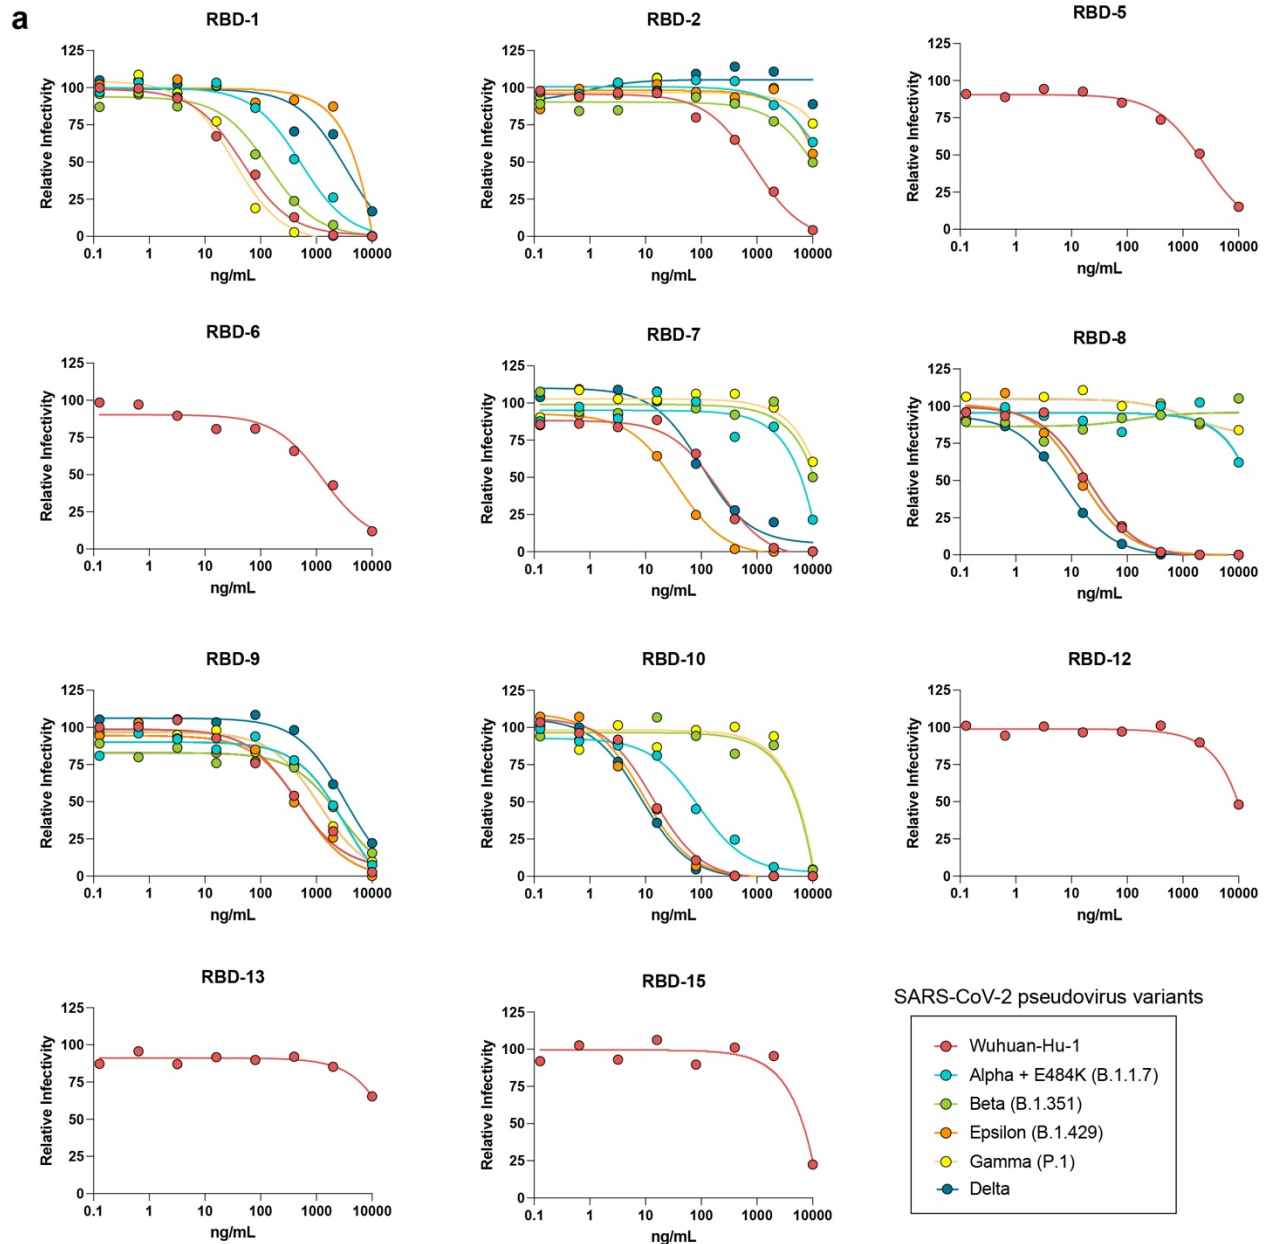

436

437 **Extended Data Figure 11: Neutralization of SARS-CoV-2 Wuhan-Hu-1 pseudovirus and**  
438 **variants by rmAbs from vaccinated individuals. a,** Neutralization curves for each selected  
439 rmAb against the five strains, measured by luminescence measurement upon SARS-CoV-2  
440 pseudoviruses infection of transgenic HeLa cells expressing human ACE2. Pseudovirus strains:  
441 Wuhan-Hu-1, Alpha+E484K, Beta, Gamma, Epsilon, and Delta.

**Extended Data Table 1.** Characteristics of participants in BNT162b2 vaccination study.

| Participant | Age   | Sex | Race      | Ethnicity    | Symptoms of BNT162b2                                         |                                                                             | Site of vaccination |               | Confirmed SARS-CoV-2 infection |      | Symptoms to SARS-CoV-2 infection         |
|-------------|-------|-----|-----------|--------------|--------------------------------------------------------------|-----------------------------------------------------------------------------|---------------------|---------------|--------------------------------|------|------------------------------------------|
|             |       |     |           |              | Dose 1                                                       | Dose 2                                                                      | Dose 1 (site)       | Dose 2 (site) | Prior                          | Post |                                          |
| P1          | 36-40 | M   | Caucasian | Hispanic     | Site tenderness                                              | Site tenderness                                                             | Left                | Left          | No                             | Yes  | Loss of smell, muscle aches, and fatigue |
| P2          | 21-25 | M   | Asian     | Not Hispanic | Site tenderness                                              | Fever, muscle aches, fatigue, chills                                        | Left                | Left          | No                             | No   | N/A                                      |
| P3          | 31-35 | M   | Asian     | Not Hispanic | Site tenderness, muscle aches                                | Site tenderness, muscle aches, headache, chills                             | Left                | Left          | No                             | No   | N/A                                      |
| P4          | 26-30 | M   | Asian     | Not Hispanic | None                                                         | Site tenderness, fever, muscle aches, fatigue, chills, loss of appetite     | Left                | Left          | No                             | No   | N/A                                      |
| P5          | 31-35 | F   | Asian     | Not Hispanic | Site tenderness                                              | Site tenderness, muscle aches, fatigue, headache                            | Right               | Right         | No                             | No   | N/A                                      |
| P6          | 46-50 | F   | Caucasian | Not Hispanic | Site tenderness, site swelling                               | Site tenderness                                                             | Left                | Left          | No                             | No   | N/A                                      |
| P7          | 51-55 | F   | Asian     | Not Hispanic | Site tenderness, muscle aches, fatigue, headache, joint pain | Site tenderness, muscle aches, fatigue, headache, joint pain, fever, chills | Right               | Right         | No                             | No   | N/A                                      |
| P8          | 26-30 | F   | Caucasian | Not Hispanic | Site tenderness                                              | Site tenderness, site swelling, muscle aches, fatigue, headache             | Left                | Left          | No                             | No   | N/A                                      |
| P9          | 36-40 | M   | Caucasian | Not Hispanic | None                                                         | None                                                                        | Right               | Right         | No                             | No   | N/A                                      |

**Extended Data Table 2.** SARS-CoV-2 pseudovirus variants used in neutralization assays.

| variant name          | greek alphabet name | Classification             | origin          | mutations                                                                 | RBD mutations (319-541) |
|-----------------------|---------------------|----------------------------|-----------------|---------------------------------------------------------------------------|-------------------------|
| <b>B.1.1.7 + 484K</b> | <b>Alpha + 484K</b> | <b>Variant of Concern</b>  | UK              | Δ69/70, Δ144, E484K, N501Y, A570D, D614G, P681H, T716I, S982A, D1118H     | E484K, N501Y            |
| <b>B.1.351</b>        | <b>Beta</b>         | <b>Variant of Concern</b>  | South Africa    | D80A, D215G, Δ241/242/243, K417N, E484K, N501Y, D614G, A701V              | K417N, E484K, N501Y,    |
| <b>P1</b>             | <b>Gamma</b>        | <b>Variant of Concern</b>  | Japan / Brazil  | L18F, T20N, P26S, D138Y, R190S, K417T, E484K, N501Y, D614G, H655Y, T1027I | K417T, E484K, N501Y,    |
| <b>B.1.617.2</b>      | <b>Delta</b>        | <b>Variant of Concern</b>  | India           | T19R, T95I, G142D, Δ156/157, R158G, L452R, T478K, D614G, P681R, D950N     | L452R, T478K            |
| <b>B.1.429</b>        | <b>Epsilon</b>      | <b>Variant of Interest</b> | US / California | S13I, W152C, L452R, D614G                                                 | L452R                   |

**Extended Data Table 3.** Expressed rmAbs derived from S<sup>+</sup> sorted B cells

| Antibody ID | Participant ID | Timepoint | IGH VDJ (aa)                                                                                                                      | IGL VJ (aa)                                                                                                       |
|-------------|----------------|-----------|-----------------------------------------------------------------------------------------------------------------------------------|-------------------------------------------------------------------------------------------------------------------|
| RBD-1       | P6             | D28       | QVQLVQSGAEVKKPGASVKVSCKASGYTFTSYDINWVRQAPGQG LEWMGWISAYNGNTNYAQKLQGRVTMTTDTSTSTAYMELRSLRS DDTAVYYCARDFFGGIAAAIVSSSRGFDYWGGTLVTVSS | QSVLTQPPSVSGAPGQRVTISCTGSSSNIGAGYDVHWYQQQL PGTAPKLLIYGNTNRPSGVPDRFSGSKSGTSASLAITGLQAE DEADYYCQSYDSSLRWVFGGGTKLTVL |
| RBD-10      | P2             | D28       | EMQLVESGGGLIQPGGSLRLSCAASGLIVSNNYMNWVRQAPGKG LEWVSVLYPGGTTYADSVKGRFTISRDNKNTLFLQMNSLRAED AAMYVCAREGRGGAFDIWGRGTMVTVSS             | DIQMTQSPSSLSASVGDRTITCQASEDISKYLNWYQQKPG KAPKLLIYDASNLETGVPSRFSGSGSGTDFTTISLQPEDLA TYYCLQYDNLPRYTFGGQTKLEIT       |
| RBD-11      | P1             | D28       | QVQLQESGPGLVKPSQTLSTCTVSGGSISSGNYWSWIRQPPGK GLEWIGYIYSGSTYYNPSLKSRTVISVDTSKNQFSLKSSVTAADT AVYYCARSLRYFDWLAERGDWFDPPWGGTLVTVSS     | EIVLTQSPATLSLSPGERATLSCRASQSVSSYLAWYQQKPG QAPRLIYDASNRTGIPARFSGSGSGTDFTLTISSLEPEDFA VYYCQQRNLFTFGPGTKVDIK         |
| RBD-12      | P5             | D28       | QVQLVQSGAEVKKPGASVKVSCKASGYTFTNYYIHWVRQAPGQG LEWMGIINPSGGSTSYAQKFGQGRVTMTTDTSTSTVYMELSSLRSE DTAVYYCARGLVVPAAKGDLDYWGGTLVTVSS      | EIVMTQSPATLSVSPGEGATLSCRASQSVSSNLAWYQQKPG QAPRLIYGASTRATGIPARFSGSGSGTEFTLTISSLQSEDF VYYCQQYNNWLYTFGGQTKLEIK       |
| RBD-13      | P7             | D28       | EVQLVESGGGLVQPGGSLRLSCAASGFTFSSYDMHWVRQATGKG LEWVSAIGTAGDTYYPGSVKGRFTISRDNKNTLYLQMNSLRAGD TAVYYCARVLYYYDSSGYKRIYWFYFDLWGRGTLVTVSS | DIQMTQSPSSLSASVGDRTITCRASQSISSYLNWYQQKPG KAPKLLIYAASSLQSGVPSRFSGSGSGTDFTLTISSLQPEDFA TYYCQQSYSTPPWTFGGQTKVEIK     |
| RBD-14      | P6             | D28       | QVQLVESGGGVVQPRSLRLSCAASGFTFSMHWVRQAPGKGLE WWAVISYDGSNKYYADSVKGRFTISRDNKNTLYLQMNSLRAEDT AVYYCAREVSGSGWPIDYWGGTLVTVSS              | SYVLTQPPSVSVAPGKTARITCGGNNIGSKSVHWYQQKPGQ APVLVYVYDSDRPSGIPERFSGSNGSNTATLTISRVEAGDEA DYYCQVWDSSEDEVFVGTGKVTVL     |

|        |    |     |                                                                                                                                          |                                                                                                                       |
|--------|----|-----|------------------------------------------------------------------------------------------------------------------------------------------|-----------------------------------------------------------------------------------------------------------------------|
| RBD-15 | P2 | D28 | QVQLVESGGGVVQPGRSLRLSCAASGFTFSSYAMHWVRQAPGK<br>GLEWVAVISYDGSNKYYVDSVKGRFTISRDNKNTLYLQMNSLRA<br>EDTAVYYCARNFWFGDEGYFDYWGQGLTVTVSS         | EIVMTQSPATLSVSPGERATLSCRASQSVSSNLAWYQQKPG<br>QAPRLLIYGASTRATGIPARFSGSGTEFTLTISSLQSEDA<br>VYYCQQYNNWPPYTFGGGKLEIK      |
| RBD-16 | P9 | D28 | EIKLVQSGGGSVQGGSLRLSCAASGFTFSAYWMHWVRQVPGKE<br>PVWVSRIHGDAETTTYVDSVKGRFTISRDNKNTLYLQMNSLRVD<br>DTAVYYCARDRLSFYSGRHTNSDAFEVWGQGTTVTVSS    | HSVLTQAPSVAAPGQKVTISCSSGNNNSNIGNNFVSWYQQFP<br>GTAPKLLIYENDKRPSGIPDRFSGSGSATLGITGLQTGD<br>EAFYYCGTWDSSLSTGRVFGGGTKLTVL |
| RBD-17 | P4 | D28 | QVQLVQSGSELKKGASVKVSCKTSGYPFSTYAMNHWVRQAPGQG<br>LEWMGWINTNTGNPTYAQGFRGRFVFLDTSVSTAYLQISSLKAE<br>DTGVYYCARSRTYYYDRSGYPQDSWGGQGLTVTVSS     | DTEMTQSPDSLAVSLGERATITCKSSHLLYSSTNKNLAW<br>YQQRPGQPRLLIYWASTREFGVDRFSGGGSGDTFTLTIS<br>SLQAEDVAVYYCQQYYNTPPTFGGQTKVEIK |
| RBD-18 | P7 | D7  | EVQLLQSGGQSVRPGGSLRLSCVASGFNFHDYAMSWVRAPPK<br>GLEWVATITGGGTITHYADSLKGRVTISRDISTSTIFLHFHNVRVEDA<br>ALYYCAKVQYQLWLSFPDHWGQGSPIAVSS         | SYDLTQSSSLSVSVGQTATITCSGSKVGGYYTSWYRKKLGQ<br>PPIIYQNDRRPSEIPDRFSGSTSGNIASLTITGTHPLDAADY<br>YCQSSDSYNVVFVGGGTTLAVL     |
| RBD-19 | P6 | D21 | QVQLQESGPGVVKPSGTLTCTVSGYSIRDGYFWGWVRQPSGK<br>GLEWIGSVYHSGTTYNPSLKSRLTISVDTSKNQFSLDSSVTAAD<br>TALYYCARGHSSVGN DYWGQALTVTVSS              | QSALTQPASVSGSPGQITISCTGSSSDVGDSDLVSWYQKY<br>PGKAPKLIIEVNRKPSGVSNNRFFGSKSGDTASLTIFGLQAE<br>DEADYYCYSHAGSSTWMFGGGTKLTVL |
| RBD-2  | P6 | D21 | QVQLVQSGAEVKKPGSSVKVSCASGGTFSSYTISWVRQAPGQG<br>LEWMGRIIPILGIANYAQKFQGRVTITADKSTSTAYMELSSLRSED<br>AVYYCARGVVGATPGYFDYWGQGLTVTVSS          | EIVMTQSPATLSVSPGERATLSCRASQSVSSNLAWYQQKPG<br>QAPRLLIYGASTRATGIPARFSGSGTEFTLTISSLQSEDA<br>VYYCQQYNNWLTFFGGGKLEIK       |
| RBD-20 | P7 | D7  | QVQLVQSGSGVKKPGASVRSVSCIASGYPFSGYALHWLRQAPGQS<br>LEWMWINGGNGNSKYQNFEGRVILSRDTSATIVYMDLTSRSE<br>DTAMYYCARGRAHCNNDGCSWGSDFDCWGQGLTVTVSS    | ESVLTQSPGTLTSLSPGERATLSCRASQTIRNNYLAWYQQKPG<br>QATPILLIYGASSRATGIPDRFSGSGTDFTLTISRLEPEDFA<br>MYYCQQYGASPMYTFGGGKLEIK  |
| RBD-21 | P9 | D28 | QITLKEGSPALVQPTQTLALCTFSGFSLTSGGLAVGWIRQPPGQA<br>HQWLALVYWDTKRFNPSLESRLTITKDTSKNQVVLMTNMDPVD<br>TGTYCAHSTGDGYFDDWGQGLTVTVSS              | DIQMTQSPSSLSASVGDRTITCRASQSIYNFLNHWYQQKPG<br>KAPKLLIYAASSLQSGVPSRFSGSGTEFILSISLQPEDSA<br>TFFCQQSYNVPYTFGGGKLEIK       |
| RBD-22 | P9 | D7  | EVQLVETGGGLIQGGSLRLSCAASGFTGSDNYMSWVRQAPGK<br>LEWVALIYIGGSTVYADSVKGRFTISRDNKNTLYLQMNTLRVEDTA<br>VYYCARDQGEDGYKDAYDIWGQGTMTVTVSS          | DIQMTQSPSSLSASVGDRTITCRASQTITTYLNHWYQQKPGK<br>APKLLIYAASALESGVPSRFSGSGTDFTLTISSLQPEDFAT<br>YVCQQYSIPHFVGGGKLEIK       |
| RBD-23 | P7 | D28 | EVQLLQSGGQSVRPGGSLRLSCVASGFNFHDYAMSWVRAPPK<br>GLEWVATISGGGTVTHYADSVKGRVTISRDISTSTIFLQFNNVKVED<br>AALYYCAKVQYQLWLSFPDHWGQGSPIAVSS         | SYDLTQSSSLSVSVGQTATITCSGSKVAQYYTSWYQKKLGQ<br>PPVLIYQNDRRPSDIPDRFSGSTSGNIASLTITGTQPLDAAD<br>YVCQSSDSYDVIFGGGTTLAVL     |
| RBD-24 | P8 | D28 | QLQLQESGGLVVKPSETLSLTCVSGGSISRGSYYSGWIRQSPGK<br>GLEWIGNIYDGYTYNPSLKSRTVMSIDTSKNQFSLQLRSVTAAD<br>TALYYCARAHGPGPPGIAAAAANWYFDLWGRGTLTVTVSS | SYVLTQPPSVSVAPGQTARITCGDDIDTESVHWYQQRPG<br>QAPVLVYDQDTRPSGIPERFSGSNSGDTATLTISRVEGGD<br>EADYYCHVWDSNSNHVVFVGGGKLEIK    |
| RBD-25 | P8 | D7  | QVQLVESGGGVVQPGRSLRLSCVASGFTLSNYLIHWVRQAPGKGL<br>EWWAVVSNDRNEYYADSVKGRLTISRDRSRQTLYLQMNSLRAE<br>DTAVYYCAREGMSVTHDGFDIWGQGTMTVTVSS        | QAGLTQPPSVSKGLRQTATLCTGNSNNVGDQGAAWLQQH<br>QGHPPKLLSYRDNNRPSGISERFSASRSGNTASLTITGLHPE<br>DEADYYCSAWDSSLAWVFGGGKLEIK   |
| RBD-26 | P8 | D7  | EVQLVESGGGLVQPGRSLRLSCAASGFTFDNYAMHWVRQVPGK<br>LQWISGIAWNSGSGVYADSVNGRFTISRDNKNSLYLQMNSLRRE<br>DTAFYYCAKDFYPLYYGSGIDWYFDLWGRGTLTVTVSS    | QSVLTQPPSASGTPGQRTVITSCSSGSSNIGNNWNWYQQLP<br>GTAPKLLIYSNNQRPSGVPDRFSGSKSDTSASLAISGLQSED<br>EADYYCAAWDDSLKGGVFGGGKLEIK |
| RBD-27 | P4 | D28 | AVQLVESGGGLVQPGGSLTSCAASGFASDTWMSWVRQAPGK<br>LEWVGRIKNTDGGTTAYAAPVQGRFTISRDRSKNTLYLQVNSLKT<br>EDTAVYYCATDGGGIHLTWGQGLTVTVSS              | ENVLTQSPATLSLSPGERATLSCGASQSVSSNYLAWYQQKPG<br>GLAPRLLIYDASSRATGIPDRFSGSGSGTDFTLTISRLEPEDF<br>ALYYCQYGSPPVTFGGGKLEIK   |
| RBD-28 | P6 | D7  | LGQLVQSGGEVRKPGASVKVSCASGYTFTETGIIHWVRQAPGQGL<br>EWMGWISNYNGNTKSAEKFGGRITMTTDTSTTASMELTGLTSD<br>TAVYYCATKHARTGGVTGNWFDWGGQGLTVTVSS       | QSALTQPRSVSGSPGQAITISCTGASTDVGRYNYVSWYQQ<br>PGKPPKLVYDVNERPSGVPLRFSGSKSGNTASLTISAVQAE<br>DEADYYCCSYAGSYIFVFGSGTRVTVL  |

|        |    |     |                                                                                                                                         |                                                                                                                           |
|--------|----|-----|-----------------------------------------------------------------------------------------------------------------------------------------|---------------------------------------------------------------------------------------------------------------------------|
| RBD-29 | P8 | D21 | QVLLVESGGGWVKPGSLRLSACAASGFNFSDFYMTWMRQAPGK<br>GLEWVSTLSASSSSVYYADSVRGRFTISRDNAKESVYLHMNTLRP<br>EDMAIYYCARGDLDYWGQGLTVTVSS              | DVVMTQSPLSLPVTGLQPASISCRSSQSLVHRDGNLYLWV<br>HQRPGQSPRRLIYKVSNRDSGVPDRFSGSGSDTDFTLKISR<br>VEAEDVGVYYCMQGTHWPPLFTFGPGTKLDIK |
| RBD-3  | P6 | D28 | QVQLQESGGLVKPSETLSLCTVSGGSISSYYWSWIRQPPGKGL<br>EWIGYIYYSGSTNYNPSLKSRTVTSVDTSKNQFSLKLSSVTAADTA<br>YYCARPFRYDSGSYWDHAFDIWQGTMTVTVSS       | QSVLTQPPSVSGAPGQRVTISCTGSSSNIGAGYDVHWYQQ<br>PGTAPKLLIYGNSNRPSGVPDRFSGSGSASLAIITGLQAE<br>DEADYYCQSYDSSLSGWEVFGGGTKLTVL     |
| RBD-30 | P4 | D21 | EVQLVESGGGLVQPPGSLRLSCVASFTEFNGHWTNWRQAPGK<br>GLEWVANMKEDGSIKYYVDSVKGRFTISTDNAKNSLYLQMNSLRD<br>EDTAVYYCARESSYETTIFTGFEIWGQGTMTVTVSS     | QAGLTQPPSVSKDLGQTATLCTGDTNNVGDGATWLQQY<br>QGHPKLLSYRNNNRPSGISERLSASRSGKTASLTITRLQPE<br>DEADYYCSAWDSSLSVWVFGGGTKLTVL       |
| RBD-4  | P6 | D28 | QVQLVQSGAEVKKPGASVKVCKASGYTFTSYDINWVRQATGHG<br>LEWWMGWMNPNNGTGYAQKFQGRVTMTRNTSISTAYMELSSLR<br>EDTAVYYCARGGRYCSSTNCSYSHVIVDWGQGTMTVTVSS  | DIQMTQSPSSLSASVGDRTITCRASQGIKNDLWYQQKPG<br>KAPKRLIFPASSLQSGVPSRFSGSGTEFTLTISSLQPEDF<br>ATYYCQLQHNNYPLTFGGGKTKVEIK         |
| RBD-5  | P8 | D21 | EVQLVESGGGLVQPPGSLRLSACAASGFTFDDYAMHWVRQAPGK<br>LEWVSGISWNSGSGVYADSVKGRFTISRDNAKNSFLQMNSLRAE<br>DTALYYCAKDIGSGYGDYFDYWGQGLTVTVSS        | SYVLTQPPSVSVAPGKTARITCGGNNIGSKSVHWYQQKPGQ<br>APVLVIYDSDRPSGIPERFSGSGNSGNTATLISRVEAGDEA<br>DYCCQVWHSSSDHYVFGTGTKVTVL       |
| RBD-6  | P1 | D28 | QVQLVESGGGVVQPPGSLRLSACAASGFTFSSYGMHWVRQAPGK<br>GLEWVAVISYDGSNKYYADSVKGRFTISRDNKNTLYLQMNSLRA<br>EDTAVYYCAKMGPPYCSGGSCYSGYFDYWGQGLTVTVSS | DIQMTQSPSSLSASVGDRTITCQASQDISNYLNWYQQKPG<br>KAPKLLIYDASNLETGVPSRFSGSGSDTDFTTISSLQPEDIA<br>TYYCQQYDNLPTFGGGKTKVEIK         |
| RBD-7  | P6 | D28 | QLQLQESGGLVKPSETLSLCTVSGGSISSSSYYWGIRQPPGK<br>GLEWIGTIYYSGSTYYPNPSLKSRTVTSVDTSKNQFSLKLSSVTAADT<br>AVYYCARRPLRHDSSGYLFDYWGQGLTVTVSS      | QSVLTQPPSVSGAPGQRVTISCTGSSSNIGAGYDVHWYQQ<br>PGTAPKLLIFVNSNRPSGVPDRFSGSGSASLAIITGLQAE<br>DEADYYCQSYDSSLSVWVFGGGTKLTVL      |
| RBD-8  | P1 | D28 | QVQLVESGGGVVQPPGSLRLSACAASGFTFSSYAMHWVRQAPGK<br>GLEWVAVISYDGSNKYYADSVKGRFTISRDNKNTLYLQMNSLRA<br>EDTAVYYCARDGVTITMVRGVIGPAFDIWQGTMTVTVSS | DIQMTQSPSSLSASVGDRTITCQASQDISNYLNWYQQKPG<br>KAPKLLIYDASNLETGVPSRFSGSGSDTDFTTISSLQPEDIA<br>TYYCQQYDNLPTFGGGKTKLEIK         |
| RBD-9  | P2 | D28 | QVQLQESGGLVKASQTLSTCTVSGGSISSGGYYWSWIRQHPGK<br>GLEWIGYIYYSGSTYYPNPSLKSRTVTSVDTSKNQFSLKLRSVTAADT<br>AVYYCARDYGGNSNYFDYWGQGLSVTVSS        | DIQMTQSPSSLSASVGDRTITCQASQDITNYLSWYQQKPG<br>KAPKLLIYDASNLETGVPSRFSGSGSDTDFTTISSLQPEDIA<br>TYYCQQYHNLPLTFGGGKTKVEIK        |
| S1n-1  | P2 | D28 | QVQLVESGGGVVQPPGSLRLSACAASGFTFSSNYPLHWVRQAPGK<br>LEWVAVISYDGSNKYYVDSVKGRFTISRDNKNTLYLQMNSLRAED<br>TAVYYCARDGSGGAFDYWGQGLTVTVSS          | QSALTQPASVSGSPGQISITISCTGTSSDVGGYNYVSWYQQH<br>PGKAPKLMYDVSNRPSGVSNRFSGSGSGNTASLTISGLQA<br>EDEADYYCSSYTSSTWVFGGGTKLTVL     |
| S1n-2  | P4 | D21 | QVQLQESGGLVKPSGTLSTCAVSGGSISSSNWWSWVRQPPGK<br>GLEWIGEIHSGNTNYNPSLKSRTVTSVDTSKNQFSLKLSSVTAADT<br>AVYYCARRSSASSGWSPLFDYWGQGLTVTVSS        | QSALTQPASVSGSPGQISITISCTGTSSDVGSYNLVSWYQQH<br>PGKAPKLMIEGSKRPSGVSNRFSGSGSGNTASLTISGLQA<br>EDEADYYCFSYAGSSTWVFGGGTKLTVL    |
| S1n-3  | P7 | D28 | QVQLQESGGLVKPSETLSLCTVSAISISSGYYWGIRQPPGK<br>LEWIGNIYHSGNTYYPNPSLKSRTVTSVDTSKNQFSLKLSSVTAADTA<br>VYYCARDLRIVVVAAYYFDYWGQGLTVTVSS        | QSALTQPASVSGSPGQISITISCTGTSSDVGSYNLVSWYQQH<br>PGKAPKLMIEGSKRPSGVSNRFSGSGSGNTASLTISGLQA<br>EDEADYYCCSYAGSTLYVFGTGKTVL      |
| S1n-4  | P7 | D7  | EVRLVESGGGLVEPGGSLRLSACAASGFTFVHSMNWRQAPGK<br>LEFVASISRNLIDYADSVKGRFTISRDNKNSVFLQMNRLRGED<br>TARYYCVRGDSSSWHLFDYWGQGLTVTVSS             | EVVLTQSPDTLSLSPGERAILSCASQSVGNLAWYQQQPG<br>QVPRLLIYGPSRATGIPDRFSGGGSGTDFTLISRLEPEDFA<br>IYYCHQYGYSPWAFGPGTKVEIK           |
| S1n-5  | P9 | D28 | EVQLVESGGGLVQPPGSLRLSCRASGFTFDYAINWVRQAPGK<br>LEWVGFIENEAYGTTDYAASVKGRFTISRDDSNSIAYLQMNSLTT<br>GDTALYYCTRNEPCFGACTTHALDPWGLTVTVSS       | EIVMTQSPLSLSVTPGEPASISCRSSQTLTYTNGNNYLDWYL<br>KQKQSPQLLIYLASKRASGVPDRFSGSGSGTDFILKISRVE<br>AEDVGVYYCMQALQAPTFGGTRLEIK     |
| S1n-6  | P6 | D28 | EVQLVESGGGLVPRGGSLRLSACAASGFTFSSYSMNWVRQAPGK<br>LEWVSSISSSTSYIHYADSVKGRFTISRDNARNLSFLQMNSLRAED<br>TAVYYCARDLSNSWYNPHYFDSWGQGLTVTVSS     | EIVLTQSPGTLTSLSPGERATLSCRASQSVSNNFLAWYQQK<br>GQAPRLLIYGASSRATGIPDRFSGRSGSGTDFTLISRLEPED<br>FAVYYCQQYGDSPRSFGPGTKVELK      |

|       |    |     |                                                                                                                                      |                                                                                                                             |
|-------|----|-----|--------------------------------------------------------------------------------------------------------------------------------------|-----------------------------------------------------------------------------------------------------------------------------|
| S2-1  | P9 | D7  | EVQLVESGGDSVQPGGSLRLSCAASGFTFSNYVHWVRQAPGK<br>GLVWVSRIREDDGIFTTYADSVKGRFTISRDNARNTVSLQMNSLRAE<br>DSAVYYCVRVKVDADLVTADYWGQGTRVTVSS    | QTVVTQEPSLTVSPGGTVTLTCASTGAVTSDFYPNWFQK<br>PGQAPRALIYSTSNKHSWTPARFSGSLLGGKAALTLGAQP<br>EDEAEYFCLLYGGAYVFGGTYVFGTGKVTVL      |
| S2-10 | P4 | D7  | EVQLVQSGAEVKEPESLTKISCKGSGYSFSTYWIWVRQLPGKGL<br>QWMGLIYPDDSDTRSNPTFQQQVMTMSVDKSTDTAYLQWSSLKAS<br>DTAMYFCARRYCPDNTCYLAADFLLWGQGMVTVSS | QSALTQPRSVSGSPGQSVTISCTGTSSDVSGSYDYVSWYQQ<br>HPGKAPRLMIYDVTKRPSGVPARFSGSKSGNTASLTISGLRA<br>EDEGHYYCCSYAGRHIYEVFGGGTKLTVL    |
| S2-11 | P2 | D28 | QVQLVESGGGVVQGRSLRLSCAASGFTFSSYAMHWVRQAPGK<br>GLEWVAVISYDGSNKYYVDSVKGRFTISRDNKNTLYLQMNSLRA<br>EDTAVYYCARVSSGSYQGLDYWGQGLTVTVSS       | EIVLTQSPDFQSVTPKEKVTITCRASQSISGSSLHWYQQKPDQ<br>SPKLLIKYASQSIGVPSRFSGSGSGTDFTLTINSLEAEDAAA<br>YYCHQSSSLPQTFGQGTKEIK          |
| S2-12 | P7 | D28 | EVQLVQSGAEVKKPGESLEISCKASGYNFTNYIGWVRQMPGKGL<br>EWMGIVYPGDSDRYSPSFQQQVTVISADKSITAYLRWRSLKASDT<br>AMYCARRQYYETDSYYPAAFDIWGQGMVTVSS    | DIQMTQSPSSLSASVGERVTITCRASQSISTYLNWYQQKPG<br>KAPKLLIYAASSLQIGVPSRFSGSGSGTAFTLTISSLQPEDFA<br>TYCQQSYTTPWTFGPGTKVEIK          |
| S2-13 | P7 | D28 | QVQLVQSGAELKKGASVSKVSCASGYTFSNFYIHWVRQAPGQG<br>LEWMGRINPIIGSTVYAQKFQGRVTMTRDTSTSTIYELIGLRSEDTA<br>LYYCGKEHDATVAAGGMEGLDHWGQGLTVTVSS  | QSALTQPRSVSGSPGQSVTISCTGTSSDVGGYNFVSWYQQ<br>HPGKAPKLMYDVTKRPSGVPYRFSGSKSGNTASLTMSGLQ<br>PEDEADYYCCSYAGRYTWVFGGGTKLTVL       |
| S2-14 | P7 | D7  | QVQLVQSGAEVKKPGASVRVSCASGYTFSSFYIHWVRQAPGQG<br>LEWMGRINPIIGSTVYAQKFQGRVTMTRDTSTNTVYIELSSLTSED<br>ALYYCGKEHDATVAEGGMEGLDHWGQGLTVTVSS  | QSALTQPRSVSGSPGQSVTISCTGTSSDVGGYNFVSWYQQ<br>HPGKAPKLMYDVNKRPSGVPYRFSGSKSGNTASLTMSGLQ<br>PEDEADYYCCSYAGRYTWVFGGGTKLTVL       |
| S2-2  | P4 | D7  | QVQLQESGPGLVKPSGTLSTCTVSGGSINISNWWIWRQSPGK<br>LEWIGEYHGGNTNYPNSLKRVSISVDKSKNQFSLSSVTAADTA<br>VYYCARAMRTENSFDYWGQGLTVTVSS             | DIQMTQSPSSLSASVGERVTITCRASQSINIYLSWYQQRP<br>KAPKLLIYGFANLQNGVPSRFSGSGSGTDFTLTITNLQPEDF<br>ATYYCQQTYNIPFTFGPGTKVDIK          |
| S2-3  | P5 | D7  | QVQLRESGPGLVLPSTLSTCTVSGGSISTEGYYWTWIRQHPGR<br>GLEWIGYIYSGSAYNPSLKRVTISIDTSENQFSLRLRSVTAADT<br>ALYFCARDDRLAIVRGAFDIWGQGMVTVSS        | EIVLTQSPGILSLSPGERATLSCRASEVSGSSFLAWYQQKPG<br>QAPRLLYMGASYRATGIPDRFSGSGSGTDFTLTIRLEAEDF<br>AVYYCQQYGSPPASFGGQGTKEIK         |
| S2-4  | P4 | D7  | QLQLVESGGGVVQGRSLRVSCAASGFLSTYAMHWVRQAPGK<br>GLEWLADLSYEGSITHYAESVKGFRFTISKDNSKNTLYLQMNSLRTD<br>DTARYYCSRGGIAGREAFDLWGQGMVTVSS       | DVVMTQSPSLPVTLGQPASISCRSSQSLVSDGNTYLIWFH<br>QRPQSPRRLIYQVSNRDSGVPDRFSGSGSGTDFTLNINRV<br>EAEVDFYFCMCGTHWPLTFGGGKVEIK         |
| S2-5  | P5 | D7  | EVHLVESGGDLVEPGGSLRLSCAASGFNFGNAWMSWVRQAPGK<br>GLEWVARIKRETDGGATDYAAPVKGRFTISRDDSKSTLYLHMNSLK<br>TEDAAVYYCTTDRRQDYDPQFDCWGQGLTVTVSS  | DIVMTQSPDSLTVSLGERATINCKSSQSLSYFNKDYLGW<br>YQKKPGQPPKMLIYWASARASGVPDRFSGSASGTDFTLTIS<br>SLQAEDVAVYYCLQYYTYPRTFGQGTKEIK      |
| S2-6  | P9 | D28 | EVQLVESGGGLVQPGGSLRLSCAASGFTFSNYVHWVRQAPGK<br>GLVWVSRIREDDGIFTTYADSVKGRFTISRDNARNTVSLQMNSLRAE<br>DSAVYYCVRVKVDLVTADYWGQGTRVTVSS      | QTVVTQEPSLTVSPGGTVTLTCASTGAVTSDYYPNWFQK<br>PGQAPRALIYSTSNKHSWTPARFSGSLLGGKAALTLGAQP<br>EDEAEYFCLLYGGAYVFGGTYVFGTGKVTVL      |
| S2-7  | P4 | D7  | QVQLQESGPGLVKPSGTLSTCTVSGGSINSYYSWVRQTPGKGL<br>EWIGYIYRGSTNYPNSLKRVTISVDTSRNQFSLKLSVTAADTAV<br>YYCARESDNWFDPWGQGLTVTVSS              | DIVMTQSPDSLAVSLGERATIRCKSSQSVMIYNNKNYLAWY<br>QKQPGQPPKLLIYWASTRESGVPDRFSGSGSGTDFTLTISSL<br>QAEDVAIYYCQQYFNTPTWTFGQGTKEIK    |
| S2-8  | P4 | D7  | QVQLQESGPGLVKPSGTLSTCTVSGASINSYYSWVRQTPGKGL<br>EWIGYIYRGSTNYPNSLKRVTMSVDTSRNQFSLRLNSVTAADT<br>AVYYCARETRDNWFDWGWGQGLTVTVSS           | DILMTQSPDSLAVSLGERATIRCKSSQSVMIYNNKNYLAWY<br>YQKQPGQPPKLLIYWASTRESGVPDRFSGSGSGTDFTLTISSL<br>SLQAEDVAIYYCQQYFNTPTWTFGQGTKEIK |
| S2-9  | P9 | D28 | EVNLVESGGGSVQPGGSLRLSCEVSGFTFSNGWMSWVRQVPGK<br>GLEWVGRIKSKADGETDYAAPVKGRFTIFRDDSKNTLFLQMNSLL<br>MEDTAVYYCASEPPYAYGRFDYWGQGLTVTVSS    | DIQMTQSPSSLSASVGERVTITCRASQNIYSLNHWYQLKPGK<br>APKLLIYAASLTQSGVPSRFSGSGSGTDFTLTISSLQPEDFAT<br>YYCQQSYSLTWTWTFGQGTKEIK        |



## 442 **Materials and methods**

### 443 **Study design, sample collection, and storage**

444 All studies were approved by the Institutional Review Board of Stanford University (IRB-3780),  
445 and the studies complied with the relevant ethical regulations. All participants provided written  
446 informed consent before participating in the study. Nine healthy individuals were enrolled in the  
447 study (Extended Data Table 1). All individuals had undergone routine RT-PCR testing prior to  
448 study. None of the participants had been previously diagnosed with SARS-CoV-2 infection.  
449 Blood samples were collected in heparin tubes (BD) at four different timepoints including pre-  
450 vaccination (D0), 7- to 9 days post initial vaccination (D7), on the day of and prior to the second  
451 dose (21- to 23 days post initial vaccination, D21), and 28 to 30 days after initial and 7-9 days  
452 after second vaccination (D28). Plasma samples were obtained after centrifugation, and stored at  
453  $-80^{\circ}\text{C}$ . Peripheral Blood Mononuclear Cells (PBMCs) were obtained by density gradient  
454 centrifugation over Ficoll PLUS media (Cytiva) and stored in cell freezing media (Thermo  
455 Fisher Scientific). Plasma samples were aliquoted and stored until use at  $-80^{\circ}\text{C}$ .

### 456 **Generation of barcoded fluorescent antigen tetramers**

457 Recombinant Avi-tag biotinylated SARS-CoV-2 S2 protein (Acro Biosystems, S2N-C52E8-  
458 25ug), SARS-CoV-2 RBD (Acro, SPD-C82E9-25ug), and SARS-CoV-2 S1 (Acro, S1N-C82E8-  
459 25ug) were mixed with barcoded, fluorescently labeled streptavidin (Biolegend) at a 4 to 1 molar  
460 ratios for 45 minutes while rotating. Excess biotin was added to saturate all streptavidin binding  
461 sites.

### 462 **Flow cytometry, cell sorting, and 10X sample preparation**

463 PBMCs were thawed at  $37^{\circ}\text{C}$ , treated for 15min with DNase and washed in complete RPMI.  
464 PBMCs were enriched for B cells using the EasySep Human Pan-B Cell Enrichment Kit (Stem  
465 Cell Technologies) according to the manufacturer instructions. B cell samples without antigen  
466 enrichment were stained with CD19, IgD, CD27, CD38 TotalSeq-C antibodies (all Biolegend).  
467 For antigen-sorted B cell samples, cells were stained with the following fluorescently labeled  
468 antibodies according to standard protocols: CD19, CD20, CD38 (all BD Biosciences), CD3,  
469 CD27, IgM, IgD, (all BioLegend), IgA (Miltenyi Biotec), Sytox blue (Thermo Fisher Scientific),  
470 and S-antigen tetramers (Extended Data Fig. 3a,b,d). Additionally, samples were labeled with

471 TotalSeq-C hashtag 1-9 antibodies (Biolegend) for demultiplexing individual samples in  
472 downstream analysis. Single cells were sorted with a FACSAria II cell sorter (BD Biosciences)  
473 into cooled 1.5 ml tubes (BioRad). FlowJo Version 10.7.1 (BD Biosciences) and R version 3.6.1  
474 was used for flow cytometry data analysis.

#### 475 **Droplet-based single-cell sequencing**

476 Using a Single Cell 5' Library and Gel Bead Kit v1.1(10X Genomics, 1000165) and Next GEM  
477 Chip G Single Cell Kit (10X Genomics, 1000120), the cell suspension was loaded onto a  
478 Chromium single cell controller (10X Genomics) to generate single-cell gel beads in the  
479 emulsion (GEMs) according to the manufacturer's protocol. Briefly, approximately 8,000 cells  
480 were added to each channel and approximately 4,000 target cells were recovered. Captured cells  
481 were lysed and the released RNA was barcoded through reverse transcription in individual  
482 GEMs. 5' Gene expression (GEX) libraries, Single Cell V(D)J libraries (1000016), and Cell  
483 surface protein libraries were constructed according to manufacturer protocols. Library quality  
484 was assessed using a 2200 TapeStation (Agilent). The libraries were sequenced using an Illumina  
485 Novaseq6000 sequencer with a paired-end 150-bp (PE150) reading strategy (Novogene).

#### 486 **Single cell RNA-seq data processing**

487 Raw gene expression and cell surface matrices were generated for each sample by the Cell  
488 Ranger Pipeline (v.6.0.1) coupled with human reference version GRCh38. Briefly, gene  
489 expression analyses of single cells were conducted using the R package Seurat (v4.0.2) to  
490 perform data scaling, transformation, clustering, dimensionality reduction, differential expression  
491 analyses and most visualization<sup>36</sup>. The count matrix was filtered to remove cells with >10% of  
492 mitochondrial genes or low gene counts (<600 for enriched B cells, <200 for sorted B cells). The  
493 normalized data were integrated into one Seurat data file using the IntegrateData function.  
494 Principal component analysis was performed using variable genes. We compared the ranking of  
495 principle components (PCs) with the percentage of variance and determined the number of first  
496 ranked PCs used to perform Uniform Manifold Approximation And Projection (UMAP)<sup>10</sup> to  
497 reduce the integrated dataset into two dimensions. Afterwards, the same number of first ranked  
498 PCs were used to construct a shared nearest-neighbor graph (SNN), and this SNN used to cluster  
499 the cells. For sorted cells, all sorted cells were used in the UMAP projection. For enriched B  
500 cells, immune cell clusters were identified using canonical markers. Contaminant cells (non-B

501 cells) were removed and the data was normalized, integrated, and clustered with only the B cells.  
502 Specific B cell clusters were identified using canonical B cell markers<sup>11</sup>(Extended Data Fig. 1).

### 503 **Identification of differentially expressed genes (DEG) and functional enrichment**

504 We performed differential gene expression testing using the FindMarkers function in Seurat with  
505 Wilcoxon rank sum test and the Benjamini–Hochberg method was used to adjust the p-values for  
506 multiple hypothesis testing. DEGs were filtered using a minimum  $\log_2$ (fold change) of 0.25 and a  
507 maximum FDR value of 0.05. Pathway analysis for the DEGs was conducted using the  
508 Metascape<sup>35</sup>.

### 509 **VDJ Sequence analysis**

510 BCR VDJ regions were generated for each sample using the Cell Ranger Pipeline (v.6.0.1). BCR  
511 sequences were then filtered to include cells that have one light and one heavy chain per cell.  
512 Consensus sequences were aligned to germline variable-chain immunoglobulin sequences with  
513 IMGT HighV-QUEST v1.8.3<sup>37</sup>. Clonal expansions were defined based on sharing the same  
514 heavy and light chain V and J genes with >70% amino acid identity in heavy and light chain  
515 CDR3s.

### 516 **Recombinant monoclonal antibody (rmAb) production**

517 Heavy chain and light chain variable sequences were codon optimized and cloned into in-house  
518 vectors, containing human IgG1 constant region or kappa or lambda constant regions,  
519 respectively. Expi293F cells were transfected with heavy chain and light chain plasmids using  
520 FectoPro (Polyplus transfection). Media was harvested after seven days, and rmAbs were  
521 purified with AmMag Protein A magnetic beads (Genscript,). Antibody concentrations were  
522 measured with a nanodrop spectrophotometer (Thermo Fisher Scientific) and human IgG  
523 quantitation ELISAs (Bethyl Laboratories).

### 524 **ELISA**

525 For protein ELISAs, MaxiSorp 384-well plates (Thermo Fisher Scientific) were coated with 1  
526  $\mu\text{g/ml}$  recombinant SARS-CoV-2 S2 protein (Acro, S2N-C52H5), SARS-CoV-2 RBD (Acro,  
527 SPD-C52H3), or SARS-CoV-2 S1 (Acro, S1N-C52H3), HCoV-OC43 Spike protein (Sino  
528 Biological, 40607-V08B), HCoV-HKU1 Spike protein (Sino Biological, 40606-V08B), HCoV-  
529 229E Spike protein (Sino Biological, 40605-V08B), HCoV-NL63 Spike protein (Sino

530 Biological, 40604-V08B) in carbonate-bicarbonate buffer at 4°C overnight. Plates were washed 6  
531 times with PBST (PBS + 0.1% Tween20) after each step. The plates were blocked with blocking  
532 buffer (PBS + 1% BSA) for 1 hour at room temperature. Human plasma was serially diluted, and  
533 added for 1 hour at room temperature. Human rmAbs were added at concentrations of 10µg/ml  
534 and three 10-fold serial dilutions, and incubated overnight at 4°C. Secondary HRP-conjugated  
535 antibodies goat anti-human IgG (Bethyl Laboratories) or HRP-conjugated goat anti-human IgA  
536 (Bethyl Laboratories) were applied for 1h at RT, and plates were developed with TMB substrate  
537 (Thermo Fisher Scientific), and stopped with 2N sulfuric acid. Plates were read on a GloMax  
538 Explorer Microplate Reader (Promega).

### 539 **Bio-Layer Interferometry**

540 rmAb interactions with S2, RBD, and S1 protein were measured on an Octet Red96e (Fortebio /  
541 Sartorius). Association and dissociation curves were measured with rmAbs bound to anti-human  
542 IgG Fc Capture (AHC) sensors at 20 nM and antigens in solution at 0, 16.7, 50, 150, and 450 nM  
543 in 1x kinetic buffer (Fortebio / Sartorius). BLI analysis software (Fortebio / Sartorius) was used  
544 for data processing and analysis. Buffer controls were subtracted from antigen values and curves  
545 were fitted globally for each group, consisting of all concentrations of the same ligand.  
546 Association and dissociation curves and constants as well as KD values for each antibody were  
547 reported and graphed with GraphPad Prism.

### 548 **Cell culture**

549 Expi293F cells were cultured in 33% Expi293 Expression Medium (Gibco) and 67%  
550 Freestyle293 Expression Medium (Gibco). HeLa-ACE2 were kindly provided by of Dennis  
551 Burton<sup>38</sup> and were cultured in Eagle's Minimum Essential Medium (ATCC, 30-2003) with 10%  
552 heat-inactivated FBS (Corning) and 100 U/ml of penicillin–streptomycin (Gibco). Lenti X 293T  
553 cells (Takara Bio) were cultured in DMEM (ATCC, 30-2002) with 10% heat-inactivated FBS  
554 (Corning) and 100 U/ml of penicillin–streptomycin (Gibco).

### 555 **Generation SARS-CoV-2 spike pseudotyped lentiviral particles**

556 Pseudotyped lentiviral particles were generated as previously described<sup>39</sup>. Briefly, LentiX 293T  
557 cells were seeded in 10cm plates. After 24 hours, cells were transfected using Fugene  
558 transfection reagent (Promega) with pHAGE-CMV-Luc2-IRES-ZsGreen-W, lentiviral helper

559 plasmids (HDM-Hgpm2, HDM-tat1b, pRC-CMV-Rev1b), and wildtype or variant SARS-CoV-2  
560 spike plasmids (parent plasmids publicly available from Jesse Bloom lab). After 48 to 60 hours,  
561 viral supernatants were collected and spun at 1000xg for 10m to remove cell debris. The  
562 lentiviral supernatants were concentrated using LentiX concentrator (Takara) according to the  
563 manufacturer's instructions. The lentiviral pellets were resuspended at 20-fold viral increase in  
564 EMEM media and stored at -80°C. Virus was titrated on HeLa-ACE2 cells.

### 565 **Viral inhibition assays**

566 Neutralization assays were performed as previously described<sup>39</sup>. Briefly, eight-fold serially  
567 diluted plasma starting at 1:80 from vaccinated individuals or five-fold serially diluted  
568 monoclonal antibodies starting at a concentration of 10µg/ml were incubated with SARS-CoV-2  
569 pseudotyped virus for 1 hour at 37°C. The mixture was added to HeLa-ACE2 cells plated the  
570 prior day. After ~50 hours post-infection, luciferase activity was measured on a GloMax  
571 Explorer Microplate Reader (Promega).

### 572 **Statistics and software**

573 GraphPad Prism version 8.4.1 and R version 3.6.1 were used for statistical analyses. Statistical  
574 tests used and significance levels are indicated in the respective methods section or in the figure  
575 legends. Graphical illustrations were created with BioRender.

### 576 **Acknowledgements:**

577 We thank all study participants who devoted time to our research. We thank Dennis Burton for  
578 providing the ACE2-HeLa cells. We thank Matthew Baker for key discussions. We thank  
579 Shaghayegh Jahanbani for antibody production. This work was supported by T32 AI007290-35  
580 to R.C.B.; National Science Foundation Graduate Research Fellowship to R.C.B; the German  
581 Research Foundation (DFG, LA3657/1) to T.V.L.; NIH R01 AR063676 and U19 AI110491 to  
582 W.H.R.

583

### 584 **Competing interests**

585 W.H.R. is a Founder, member of the Board of Directors, and consultant to  
586 Atreca, Inc.

587

588

589 **Author contributions**

590 Author contributions: Conceptualization, R.C.B., T.V.L., W.H.R.; Methodology, R.C.B., T.V.L.,  
591 N.S.R., L.J.L.; Software, R.C.B., T.V.L.; Validation, R.C.B., T.V.L.; Formal Analysis, R.C.B.,  
592 T.V.L.; Investigation, R.C.B., T.V.L.; Resources, R.C.B., T.V.L., W.H.R.; Data Curation,  
593 R.C.B., T.V.L.; Writing – Original Draft, R.C.B., T.V.L.; Writing – Review & Editing, R.C.B.,  
594 T.V.L., N.S.R., L.J.L., W.H.R.; Visualization, R.C.B., T.V.L.; Supervision, T.V.L., W.H.R.;  
595 Project Administration, R.C.B., T.V.L., W.H.R.; Funding Acquisition, R.C.B., T.V.L., W.H.R..

596

597 **Materials Availability**

598 Materials generated in this study will be made available on request and may require a material  
599 transfer agreement.

600

601 **Data Availability Statements**

602 The raw sequencing data will be uploaded in the GEO database before final publication.

603 **References**

- 604 1. Amanat, F. *et al.* SARS-CoV-2 mRNA vaccination induces functionally diverse antibodies  
605 to NTD, RBD, and S2. *Cell* (2021) doi:10.1016/j.cell.2021.06.005.
- 606 2. Röltgen, K. *et al.* mRNA vaccination compared to infection elicits an IgG-predominant  
607 response with greater SARS-CoV-2 specificity and similar decrease in variant spike  
608 recognition. *medRxiv* (2021) doi:10.1101/2021.04.05.21254952.
- 609 3. Polack, F. P. *et al.* Safety and Efficacy of the BNT162b2 mRNA Covid-19 Vaccine. *N.*  
610 *Engl. J. Med.* **383**, 2603–2615 (2020).
- 611 4. Vogel, A. B. *et al.* BNT162b vaccines protect rhesus macaques from SARS-CoV-2. *Nature*  
612 **592**, 283–289 (2021).
- 613 5. Wrapp, D. *et al.* Cryo-EM Structure of the 2019-nCoV Spike in the Prefusion  
614 Conformation. *bioRxiv* (2020) doi:10.1101/2020.02.11.944462.
- 615 6. Huang, Y., Yang, C., Xu, X.-F., Xu, W. & Liu, S.-W. Structural and functional properties of  
616 SARS-CoV-2 spike protein: potential antiviral drug development for COVID-19. *Acta*

- 617 *Pharmacol. Sin.* **41**, 1141–1149 (2020).
- 618 7. Piccoli, L. *et al.* Mapping Neutralizing and Immunodominant Sites on the SARS-CoV-2  
619 Spike Receptor-Binding Domain by Structure-Guided High-Resolution Serology. *Cell* **183**,  
620 1024–1042.e21 (2020).
- 621 8. Planas, D. *et al.* Reduced sensitivity of SARS-CoV-2 variant Delta to antibody  
622 neutralization. *Nature* (2021) doi:10.1038/s41586-021-03777-9.
- 623 9. Ehling, R. A. *et al.* Single-Cell Sequencing of Plasma Cells from COVID-19 Patients  
624 Reveals Highly Expanded Clonal Lineages Produce Specific and Neutralizing Antibodies to  
625 SARS-CoV-2. (2021) doi:10.2139/ssrn.3817802.
- 626 10. Becht, E. *et al.* Dimensionality reduction for visualizing single-cell data using UMAP. *Nat.*  
627 *Biotechnol.* (2018) doi:10.1038/nbt.4314.
- 628 11. Sanz, I. *et al.* Challenges and Opportunities for Consistent Classification of Human B Cell  
629 and Plasma Cell Populations. *Front. Immunol.* **10**, 2458 (2019).
- 630 12. Krzyzak, L. *et al.* CD83 Modulates B Cell Activation and Germinal Center Responses. *J.*  
631 *Immunol.* **196**, 3581–3594 (2016).
- 632 13. Maddur, M. S. *et al.* Human B cells induce dendritic cell maturation and favour Th2  
633 polarization by inducing OX-40 ligand. *Nat. Commun.* **5**, 4092 (2014).
- 634 14. Bortnick, A. & Allman, D. What is and what should always have been: long-lived plasma  
635 cells induced by T cell-independent antigens. *J. Immunol.* **190**, 5913–5918 (2013).
- 636 15. Cho, A. *et al.* Robust memory responses against influenza vaccination in pemphigus  
637 patients previously treated with rituximab. *JCI Insight* **2**, (2017).
- 638 16. Fink, K. Origin and Function of Circulating Plasmablasts during Acute Viral Infections.  
639 *Front. Immunol.* **3**, 78 (2012).
- 640 17. Mei, H. E. *et al.* Blood-borne human plasma cells in steady state are derived from mucosal  
641 immune responses. *Blood* **113**, 2461–2469 (2009).
- 642 18. Krammer, F. The human antibody response to influenza A virus infection and vaccination.  
643 *Nat. Rev. Immunol.* **19**, 383–397 (2019).
- 644 19. McKean, D. *et al.* Generation of antibody diversity in the immune response of BALB/c  
645 mice to influenza virus hemagglutinin. *Proc. Natl. Acad. Sci. U. S. A.* **81**, 3180–3184  
646 (1984).
- 647 20. Dugan, H. L. *et al.* Preexisting immunity shapes distinct antibody landscapes after influenza

- 648 virus infection and vaccination in humans. *Sci. Transl. Med.* **12**, (2020).
- 649 21. Ladner, J. T. *et al.* Epitope-resolved profiling of the SARS-CoV-2 antibody response  
650 identifies cross-reactivity with endemic human coronaviruses. *Cell Rep Med* **2**, 100189  
651 (2021).
- 652 22. Premkumar, L. *et al.* The receptor binding domain of the viral spike protein is an  
653 immunodominant and highly specific target of antibodies in SARS-CoV-2 patients. *Sci*  
654 *Immunol* **5**, (2020).
- 655 23. Ladner, J. T. *et al.* Epitope-resolved profiling of the SARS-CoV-2 antibody response  
656 identifies cross-reactivity with an endemic human CoV. *bioRxiv* (2020)  
657 doi:10.1101/2020.07.27.222943.
- 658 24. Kreer, C. *et al.* Longitudinal Isolation of Potent Near-Germline SARS-CoV-2-Neutralizing  
659 Antibodies from COVID-19 Patients. *Cell* **182**, 843–854.e12 (2020).
- 660 25. Gaebler, C. *et al.* Evolution of antibody immunity to SARS-CoV-2. *Nature* **591**, 639–644  
661 (2021).
- 662 26. Li, Q. *et al.* SARS-CoV-2 501Y.V2 variants lack higher infectivity but do have immune  
663 escape. *Cell* **184**, 2362–2371.e9 (2021).
- 664 27. Li, Q. *et al.* The Impact of Mutations in SARS-CoV-2 Spike on Viral Infectivity and  
665 Antigenicity. *Cell* **182**, 1284–1294.e9 (2020).
- 666 28. Palm, A.-K. E. & Henry, C. Remembrance of Things Past: Long-Term B Cell Memory  
667 After Infection and Vaccination. *Front. Immunol.* **10**, 1787 (2019).
- 668 29. Lederer, K. *et al.* SARS-CoV-2 mRNA Vaccines Foster Potent Antigen-Specific Germinal  
669 Center Responses Associated with Neutralizing Antibody Generation. *Immunity* **53**, 1281–  
670 1295.e5 (2020).
- 671 30. Turner, J. S. *et al.* SARS-CoV-2 mRNA vaccines induce persistent human germinal centre  
672 responses. *Nature* (2021) doi:10.1038/s41586-021-03738-2.
- 673 31. Zuccarino-Catania, G. V. *et al.* CD80 and PD-L2 define functionally distinct memory B cell  
674 subsets that are independent of antibody isotype. *Nat. Immunol.* **15**, 631–637 (2014).
- 675 32. Abbott, R. K. *et al.* Precursor Frequency and Affinity Determine B Cell Competitive Fitness  
676 in Germinal Centers, Tested with Germline-Targeting HIV Vaccine Immunogens. *Immunity*  
677 **48**, 133–146.e6 (2018).
- 678 33. Turner, J. S. *et al.* Human germinal centres engage memory and naive B cells after



- 679 influenza vaccination. *Nature* **586**, 127–132 (2020).
- 680 34. Li, X. *et al.* Cbl Ubiquitin Ligases Control B Cell Exit from the Germinal-Center Reaction.  
681 *Immunity* **48**, 530–541.e6 (2018).
- 682 35. Zhou, Y. *et al.* Metascape provides a biologist-oriented resource for the analysis of systems-  
683 level datasets. *Nat. Commun.* **10**, 1523 (2019).
- 684 36. Hao, Y. *et al.* Integrated analysis of multimodal single-cell data. *Cell* **184**, 3573–3587.e29  
685 (2021).
- 686 37. Alamyar, E., Duroux, P., Lefranc, M.-P. & Giudicelli, V. IMGT(®) tools for the nucleotide  
687 analysis of immunoglobulin (IG) and T cell receptor (TR) V-(D)-J repertoires,  
688 polymorphisms, and IG mutations: IMGT/V-QUEST and IMGT/HighV-QUEST for NGS.  
689 *Methods Mol. Biol.* **882**, 569–604 (2012).
- 690 38. Rogers, T. F. *et al.* Isolation of potent SARS-CoV-2 neutralizing antibodies and protection  
691 from disease in a small animal model. *Science* **369**, 956–963 (2020).
- 692 39. Crawford, K. H. D. *et al.* Protocol and Reagents for Pseudotyping Lentiviral Particles with  
693 SARS-CoV-2 Spike Protein for Neutralization Assays. *Viruses* **12**, (2020).
